# 1 **Living Neural Networks: Dynamic Network Analysis of Developing Neural Progenitor Cells**

2 Arun S. Mahadevan<sup>1</sup>, Nicolas E. Grandel<sup>3</sup>, Jacob T. Robinson<sup>1,2</sup>, Kevin R. Francis<sup>4,5</sup>, Amina A.

3 Qutub<sup>1\*</sup>

4

5 <sup>1</sup>Department of Bioengineering, <sup>2</sup>Department of Electrical and Computer Engineering, Rice

6 University, Houston, Texas, U.S.A., <sup>3</sup>Stanford University, California 94305, <sup>4</sup>Cellular Therapies and

7 Stem Cell Biology Group, Sanford Research, Sioux Falls, South Dakota, USA, <sup>5</sup>Department of

8 Pediatrics, The University of South Dakota Sanford School of Medicine, Vermillion, South Dakota,

9 USA

10 \*Contact: [amina@rice.edu](mailto:amina@rice.edu)

11

## 12 **ABSTRACT**

13 The architecture of the mammalian brain has been characterized through decades of innovation in the

14 field of network neuroscience. However, the assembly of the brain from progenitor cells is an immensely

15 complex process, and a quantitative understanding of how neural progenitor cells (NPCs) form neural

16 networks has proven elusive. Here, we introduce a method that integrates graph-theory with long-term

17 imaging of differentiating human NPCs to characterize the evolution of spatial and functional network

18 features in NPCs during the formation of neural networks in vitro. We find that the rise and fall in spatial

19 network efficiency is a characteristic feature of the transition from immature NPC networks to mature

20 neural networks. Furthermore, networks at intermediate stages of differentiation that display high spatial

21 network efficiency also show high levels of network-wide spontaneous electrical activity. These results

22 support the view that network-wide signaling in immature progenitor cells gives way to a hierarchical

23 form of communication in mature neural networks. We also leverage graph theory to study the spatial

24 features of individual cell types in developing cultures, uncovering spatial features of polarized  
25 neuroepithelium. Finally, we employ our method to uncover aberrant network features in a  
26 neurodevelopmental disorder using induced pluripotent stem cell (iPSC) models. The “Living Neural  
27 Networks” method bridges the gap between developmental neurobiology and network neuroscience, and  
28 offers insight into the relationship between developing and mature neural networks.

29

## 30 **INTRODUCTION**

31 The study of complex, multiscale brain networks using concepts from graph theory and network science  
32 – an approach collectively termed network neuroscience – has enabled significant insight into the  
33 structural and functional organization of the brain<sup>1,2</sup>. Micro-connectomics – the study of organizational  
34 principles of neuronal networks at the cellular scale<sup>3,4</sup>, is an important subset of complex brain networks  
35 that has yielded insight into architectural features of the nervous system at the level of their basic building  
36 blocks. A number of studies have applied graph-theoretic approaches to study the functional and  
37 anatomical connectivity of *in vitro* neuronal cultures formed from dissociated cells<sup>5-7</sup>. These studies have  
38 shown, for instance, that *in vitro* neuronal networks self-assemble in a small-world topology with high  
39 clustering and low path length. Micro-connectomic analyses of slice cultures<sup>8,9</sup>, and more recently, large-  
40 scale network reconstructions<sup>10</sup>, have revealed fundamental properties of mammalian cortical networks,  
41 such as long-tailed synaptic connectivity, the presence of preferentially connected subgroups of neurons  
42 and overrepresentation of certain network motifs. However, despite the progress made in understanding  
43 the fundamental architectural features of neural networks, no models have been available to study the  
44 development of human neural networks from progenitor cells in a quantitative manner, nor have there  
45 been tools to characterize the spatial and functional dynamics of network formation at the cellular level.

46

47 Cell-cell communication among neural progenitor cells (NPCs) is an essential aspect of human nervous  
48 system development. Neural progenitor cells cluster together in specialized microenvironments or niches  
49 where communication with neighboring cells plays an important role in determining cell behavior<sup>11</sup>. Prior  
50 to the formation of functional synapses, NPCs display structured intercellular communication that plays a  
51 critical role in the spatiotemporal control of self-renewal and differentiation, and shapes developing  
52 neural circuits. Examples of structured cell-cell communication include patterned, spontaneous electrical  
53 activity mediated partly through gap junctional coupling<sup>12-14</sup>, maintenance of intercellular configurations  
54 through tight junction proteins<sup>15</sup> and control of cell differentiation through Notch signaling<sup>16,17</sup>. Notably,  
55 the predominant forms of communication employed by NPCs can be described as juxtacrine signaling, i.e.,  
56 requiring direct cell-cell contact. This is in contrast to communication in mature neuronal networks, where  
57 the physical wiring among neurons is important and network-wide information is conveyed primarily  
58 through synaptic contacts. Given the dominance of juxtacrine modes of signaling among progenitor cells,  
59 graph-theoretic approaches need to be modified to study developing neural networks.

60

61 To enable the bridge between development and network neuroscience, we harness another emerging  
62 technology: directed differentiation of human stem cells. In recent years, significant advances in stem cell  
63 differentiation protocols have made it possible to produce a multitude of neuronal types and have  
64 provided a standardized workflow for generating functional human neurons *in vitro*<sup>18</sup>. Monolayer cultures  
65 of human stem cells capture many aspects of *in vivo* neural development, such as spatial and temporal  
66 features of cortical neurogenesis<sup>19,20</sup>. In addition, iPSC models have been used to study aberrant  
67 development in several neurodevelopmental disorders<sup>21,22</sup>. The ubiquity of stem cell differentiation  
68 protocols provides a unique opportunity to study the self-assembly of neural networks in a dish.

69

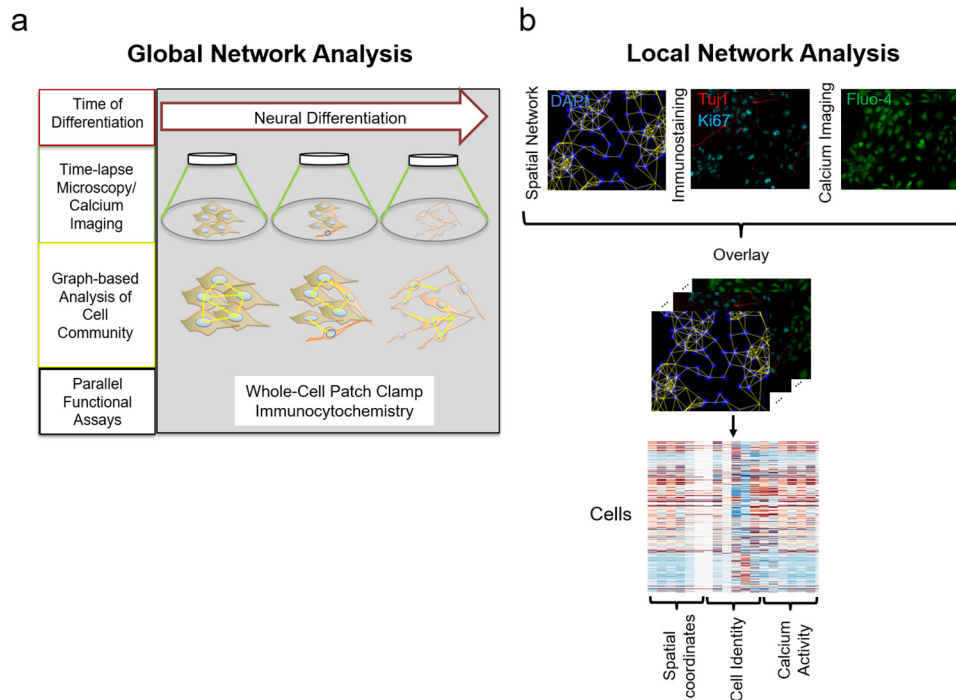

**Figure 1.** Schematic of the Living Neural Networks paradigm. **(a)** Global network analysis to uncover broad trends in NPC spatial arrangement, with parallel functional assays. **(b)** Local network analysis to reveal spatial coordinates of individual cells in culture.

70 In this report, we introduce a method to study network features of developing human neural networks at  
 71 the global and single-cell levels. We use long-term imaging coupled with automated image analysis to  
 72 develop network representations of cell spatial topology and assign spatial coordinates to individual cells  
 73 **(Figure 1)**. We use our method to demonstrate that two independent human NPC cell lines exhibit a  
 74 similar rise and fall in spatial network efficiency that characterizes the maturation of *in vitro* neural  
 75 networks. We demonstrate that high spatial network efficiencies at intermediate stages of neural  
 76 differentiation are linked with high levels of spontaneous electrical activity. We also use the graph method  
 77 to uncover the spatial coordinates of specific cell types in developing cultures and aberrant spatial  
 78 phenotypes in a neurodevelopmental disease model. The paradigm presented here can be used to  
 79 uncover fundamental features of neural network formation from progenitor cells and link cellular spatial  
 80 organization to function.

## 82 RESULTS

### 83 Functional characterization and spatial network representation of differentiating NPC cultures.

84 In the first part of this study, we used primary hNP1 neural progenitor cells derived from H9 human  
 85 embryonic stem cells. These cells were maintained as undifferentiated, mitotic progenitor cells in the

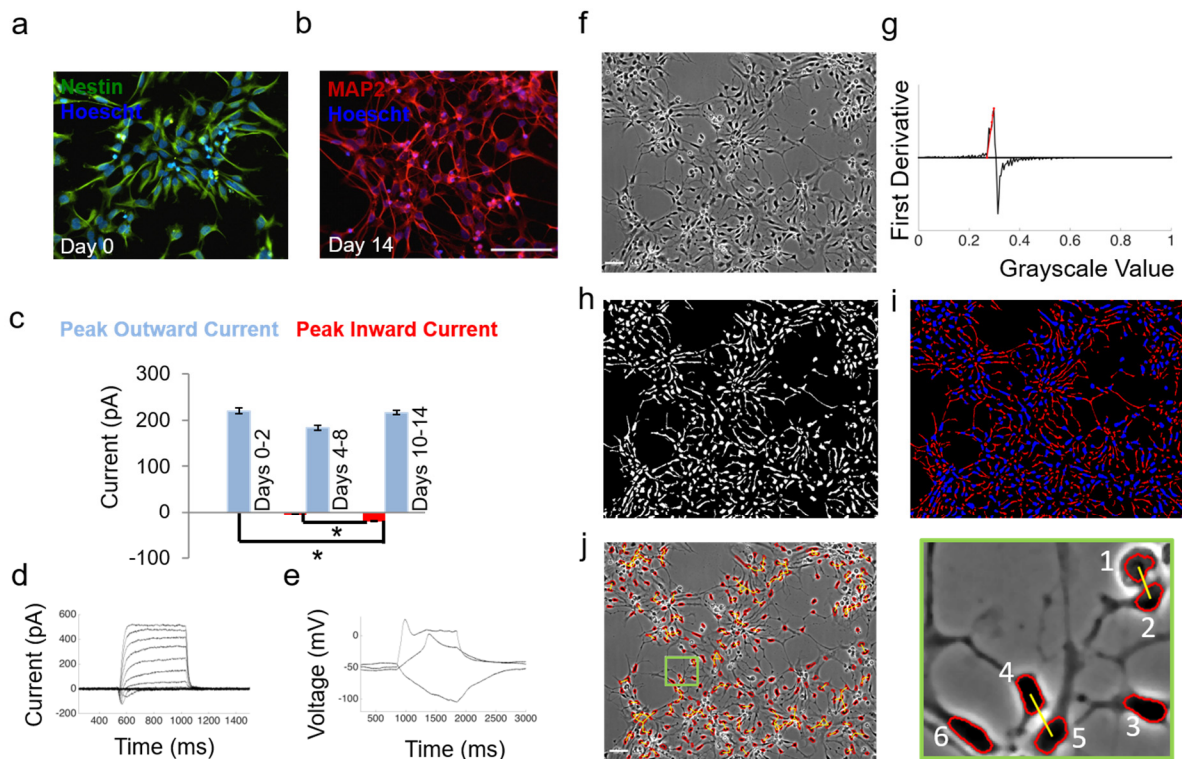

**Figure 2. Functional characterization and spatial network representation of differentiating NPCs.** (a) hNP1 cells at day 0 stain positively for Nestin. (b) Cells at day 14 stain positive for MAP2. In (a-b) nuclei are labeled by Hoescht; scale bar = 100 $\mu$ m. (c) Peak inward and outward currents determined through whole-cell patch clamp electrophysiology. Sample sizes: n=17, n=25, n=33 cells recorded for day 0-2, day 4-8 and day 10-14 respectively. Error bars represent SEM; \*p < 0.05 from two-sample t-test. (d) Voltage-gated inward and outward currents seen in a cell at day 14. Voltage steps applied were from -60mV to +90mV in 10mV increments. (e) Weak action potentials evoked from the same cell through current injection. Magnitudes of current injected are -30pA, +20pA and +120pA from holding. (f) Representative phase contrast image of hNP1 cells, shown at day 3; scale bar = 50  $\mu$ m. (g) First derivative of the pixel intensity histogram, with a linear fit to the ascending portion shown as a red line. The point where this line met the x-axis was used as a threshold for segmentation. (h) Binary image obtained upon thresholding the grayscale image. (i) Separation of linear features through morphological opening of the binary image yields cell bodies (blue) and neurites (red). (j) Phase contrast image from (f) with soma boundaries overlaid in red, and proximity edges shown in yellow. Inset shows six somas, of which two pairs (1, 2) and (4, 5) are connected by proximity edges; the intercellular distance for these two pairs are smaller than their average diameter multiplied by a scaling factor  $S = 2$ ; Soma 3 and 6 are isolated nodes since they are not sufficiently close to any other soma. All microscope images are displayed with enhanced contrast for easy visualization.

86 presence of basic fibroblast growth factor (bFGF). Withdrawal of growth factors from culture medium was  
87 used to induce spontaneous differentiation of hNPCs<sup>23</sup>.  
88  
89 First, we performed immunocytochemistry and whole-cell patch clamp electrophysiology experiments to  
90 uncover the time course of functional development in differentiating hNP1 cells. Multipotent NPCs prior  
91 to beginning neural induction were uniformly positive for Nestin, a Type VI intermediate filament protein  
92 expressed by dividing neural progenitor cells (**Figure 2a**). Cells at day 14 of neural induction were positive  
93 for microtubule-associated protein-2 (MAP2), a protein associated with dendrite formation in maturing  
94 neurons (**Figure 2b**). Analysis of peak inward and outward currents from voltage-clamp experiments  
95 showed that cells at all developmental stages exhibited equivalent levels of outward currents, but showed  
96 increasing magnitudes of inward currents (**Figure 2c, d**). Inward currents are typically driven by voltage-  
97 gated sodium channels and their presence indicates a more mature neuronal phenotype. Furthermore,  
98 weak action potentials could be elicited from cells showing inward currents at later time points (3/11 cells  
99 at day 14) through current injection (**Figure 2e**). These experiments demonstrated that Nestin-positive  
100 hNP1 cells matured over 14 days to MAP2-positive neurons, with neuronal fate commitment likely  
101 occurring between days 4-8, as indicated by the appearance of functional neuronal phenotypes in that  
102 time period.  
103  
104 In order to uncover topological changes in differentiating hNP1 cells, we combined long-term imaging of  
105 differentiating cultures with a graph-based approach for quantifying cell community structure.  
106 Differentiating cultures were imaged at days 0, 3, 6, 9, 12 and 14 after withdrawal of bFGF. An additional  
107 dataset was obtained by imaging differentiating cultures at 1-hour intervals for a total duration of 8 days  
108 (**Supplementary Video 1**). Selected image sequences were analyzed using custom image-processing

109 algorithms, resulting in the extraction of soma and neurites for each phase-contrast image (**Figure 2f-i**)  
110 (see Methods for details).

111

112 We built network representations of spatial topology by denoting cell soma as nodes and using spatial  
113 proximity between soma to assign edges (**Figure 2j, k**). The resulting adjacency matrix,  $A$ , represented the  
114 spatial topology of cells, where  $A_{i,j} = 1$  if an edge existed between cells  $i$  and  $j$ , and 0 otherwise. In this  
115 manner, we constructed non-weighted, undirected graphs representing hNP1 communities from  
116 microscope images (**Supplementary Video 2**).

117

### 118 **Structure and information flow in NPC spatial graphs**

119 In order to describe the structure and topology of hNP1 spatial graphs, we evaluated 17 metrics derived  
120 from graph theory that were computed and normalized appropriately to account for network size (**Table**  
121 **1**)<sup>24</sup>. The network metrics provide information on various aspects of the graph structure such as  
122 information flow, connectivity and abundance of motifs (repeating patterns of cell arrangements).  
123 Through analyses of the covariance matrix of 17 metrics via hierarchical clustering, we were able to  
124 identify several strong positive correlations among degree-related metrics including average degree,  
125 average neighbor degree and degree variances (**Figure 3a**). We also identified negative metric correlations  
126 including those between network efficiency and number of connected components, as well as between  
127 clustering coefficient and all degree-related metrics. In the following section, we focus on metrics that  
128 have intuitive biological interpretations, their trends across time of differentiation, and their observed  
129 relationships with other metrics. Additional trends in metrics are presented in **Supplementary Figure 4**.

130

131 Network efficiency and clustering coefficient are commonly used measures of efficiency in global and local  
132 information flow<sup>25</sup> (**Table 1**). When applied to hNP1 networks, these metrics describe the efficiency of

133 information exchange at the network-wide and local neighborhood levels through cell soma proximity  
134 (compared to random graphs obtained through degree-preserving rewiring) (**Supplementary Figure 3**). In  
135 this context, information exchange could include the flow of ions through gap junctions or the diffusion  
136 of chemical signals from cell to cell. Evaluation of these metrics in hNP1 networks sampled across 30  
137 different spatial locations from two biologically independent experiments showed that network efficiency  
138 increased from day 0 to day 6 and then decreased from day 6 to 14, while clustering coefficient rose  
139 constantly from day 0 to 14 (**Figure 3b,c**). Thus, there appears to be a transition from topologies favoring  
140 global information flow to those favoring a hierarchical form of communication, occurring between day 6  
141 and 14 of differentiation.

142



143  
144  
145

**Table 1. Global metrics computed, their descriptions, and mode of normalization to account for the network size. n = number of nodes, m = number of edges.**

| <b>Graph Metrics</b>                        | <b>Shorthand</b>      | <b>Definition</b>                                                                                                        | <b>Normalization</b>                                                                                                                                                                 |
|---------------------------------------------|-----------------------|--------------------------------------------------------------------------------------------------------------------------|--------------------------------------------------------------------------------------------------------------------------------------------------------------------------------------|
| <b>Network Density</b>                      | NetworkDensity        | Average degree of graph, normalized by total maximum possible degree<br>$\text{NetworkDensity} = \frac{2m}{n(n-1)}$      | Maximum possible degree, $(n - 1)$                                                                                                                                                   |
| <b>Variance in Degree</b>                   | varK                  | Variance of normalized node degree sequence                                                                              | Node degree sequence normalized by maximum possible degree, $(n-1)$                                                                                                                  |
| <b>Network Heterogeneity</b>                | NetworkHeterogeneity  | Standard deviation of normalized node degree sequence divided by mean of degree sequence                                 | -                                                                                                                                                                                    |
| <b>Average Neighbor Degree</b>              | avgeK_neighbor        | Average degree of node neighborhood, across all nodes                                                                    | Maximum possible degree, $(n-1)$                                                                                                                                                     |
| <b>Variance in Neighbor Degree</b>          | varK_neighbor         | Variance of the normalized average neighbor degree sequence                                                              | -                                                                                                                                                                                    |
| <b>Network Efficiency</b>                   | NetworkEfficiency     | The average reciprocal of shortest path length across all pairs of nodes, $E$                                            | Average network efficiency of 100 random graphs generated through degree-preserving rewiring, $E_{rand}$ . Random graph generation is illustrated in <b>Supplementary Figure 3</b> . |
| <b>Average Clustering Coefficient</b>       | ClusteringCoefficient | Fraction of total possible links among the neighbors of a node that are actually present, averaged across all nodes, $C$ | Average clustering coefficient of 100 random graphs generated through degree-preserving rewiring, $C_{rand}$                                                                         |
| <b>Number of connected components</b>       | nConnectedComponents  | Number of disconnected sub-graphs in main graph                                                                          | -                                                                                                                                                                                    |
| <b>Average Size of Connected Components</b> | AvgeComponentSize     | Average number of nodes in each connected component                                                                      | Total nodes, $n$                                                                                                                                                                     |

|                                                 |                    |                                                                                                                                                                     |                                                                                                          |
|-------------------------------------------------|--------------------|---------------------------------------------------------------------------------------------------------------------------------------------------------------------|----------------------------------------------------------------------------------------------------------|
| <b>Variance in size of connected components</b> | VarComponentSize   | -                                                                                                                                                                   | -                                                                                                        |
| <b>Network Diameter</b>                         | NetworkDiameter    | Longest shortest path length of network                                                                                                                             | Longest possible path, (n-1)                                                                             |
| <b>Triangular loop count</b>                    | nLoops3            | Number of loops of 3 nodes                                                                                                                                          | Total possible number of triplets, ${}^nC_3$                                                             |
| <b>4-star motif Count</b>                       | nStar4             | Number of star motifs with one hub and three spokes                                                                                                                 | Total possible number of 4-tuples, ${}^nC_4$                                                             |
| <b>5-star motif count</b>                       | nStar5             | Number of star motifs with one hub and four spokes                                                                                                                  | Total possible number of 5-tuples, ${}^nC_5$                                                             |
| <b>6-star motif count</b>                       | nStar6             | Number of star motifs with one hub and five spokes                                                                                                                  | Total possible number of 6-tuples, ${}^nC_6$                                                             |
| <b>Rich-Club Metric Average</b>                 | AvgeRichClubMetric | Measure of the tendency of nodes with high number of links to be well connected among each other <sup>26</sup> ; Computed for threshold degrees between 1 and (n-1) | Average Rich-Club Metric of 100 random graphs generated through degree-preserving rewiring, $RCM_{rand}$ |
| <b>Assortativity</b>                            | Assortativity      | Pearson correlation coefficient of degrees between pairs of linked nodes <sup>27</sup> .                                                                            | -                                                                                                        |

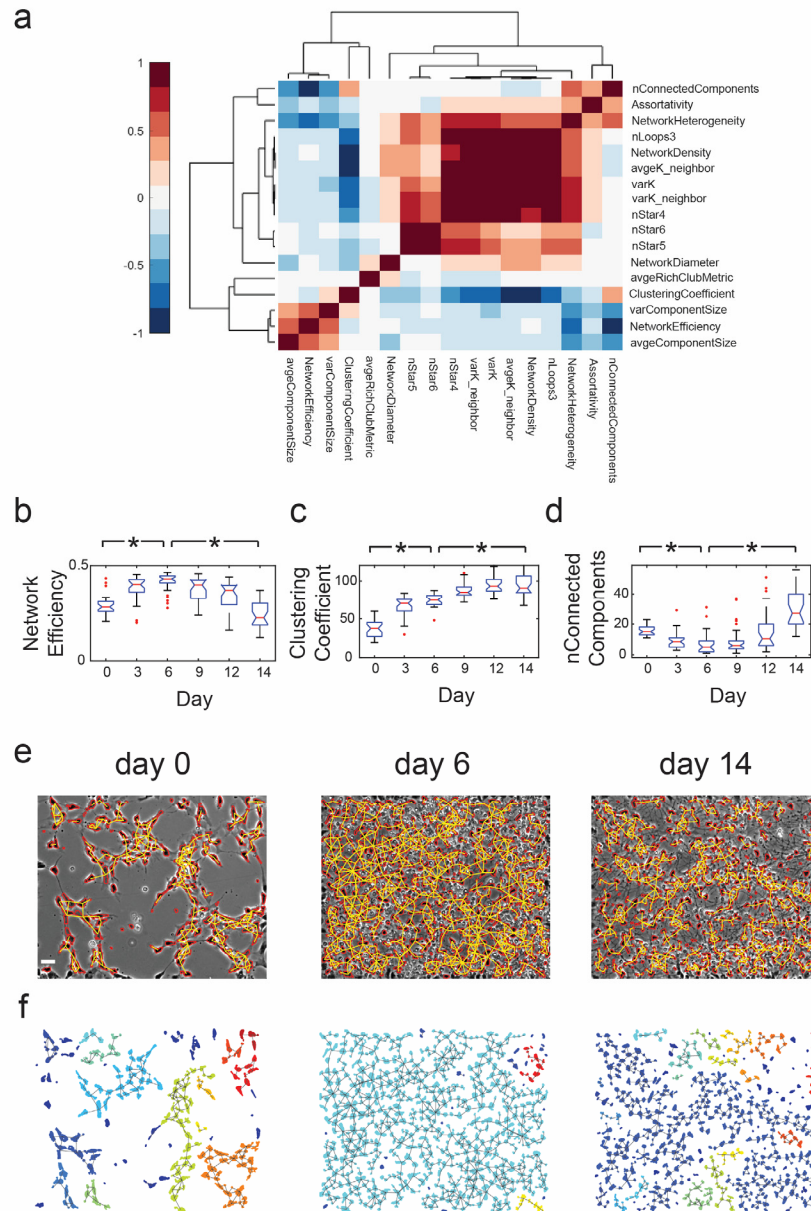

**Figure 3. Spatial network efficiency is highest at intermediate stages of differentiation. (a)** Correlation heatmap of all metrics obtained by hierarchical clustering of the covariance matrix. Clustering was performed using average linkage and Pearson correlation as the distance metric (shown in legend). Rows and columns are labeled with shorthand for metrics (Table 1). **(b)** Box plot of network efficiency across time. **(c)** Box plot of clustering coefficient across time. **(d)** Box plot of number of connected components across time. **(e)** Spatial graph representations of images taken at day 0, day 6 and day 14. Cell soma are outlined in red and edges are shown in yellow; scale bar = 50µm. **(f)** Cell soma from the images in (e), with each connected component labeled with distinct colors. For box plots in (b-d), red notches represent median ( $Q_2$ ), length of boxes represent interquartile range ( $IQR$ ), length of notches represent  $Q_2 \pm (1.57 \times IQR / \sqrt{n})$ , whiskers represent  $Q_1 - (1.5 \times IQR)$  and  $Q_3 + (1.5 \times IQR)$  and red circles represent outliers.  $Q_1 = 25^{\text{th}}$  percentile,  $Q_2 = \text{median}$ ,  $Q_3 = 75^{\text{th}}$  percentile,  $n = 30$  data points for each box plot. \*  $p < 0.00029$  from Wilcoxon signed rank test (significance threshold adjusted using Bonferroni correction for 17 statistical tests to  $0.005/17 = 0.00029$ )

148 The metric correlation heatmap showed a strong negative correlation between network efficiency and  
149 number of connected components in the graph (**Figure 3a**). The number of connected components is a  
150 count of the number of disconnected sub-graphs in the main network and is a measure of the connectivity  
151 of the graph – a graph with a high number of connected components has a low connectivity (**Figure 3d**).  
152 NPC networks at day 0, 6, and 14 are shown in **Figure 3e** and the corresponding connected components  
153 are shown in **Figure 3f**. Analysis of NPC networks at day 0, 6, and 14 identified the formation of a giant  
154 connected component likely due to continued cell proliferation through day 6 of differentiation (**Figure**  
155 **3e,f**). This increase in the connectivity of the network resulted in an increase in network efficiency (**Figure**  
156 **3b**). The subsequent disaggregation of the large component into smaller modules between days 6 to 14  
157 contributes to the decrease in network efficiency seen at later developmental stages (**Figure 3b**).

158

#### 159 **Development of functional and spatial networks.**

160 We next probed the relationship between functional and spatial networks in developing NPCs using  
161 ReNcell VM immortalized human neural progenitor cells. Differentiation induced by growth factor  
162 withdrawal led to the formation of dense networks within 5 days, rapid exit from the cell cycle (as seen  
163 by reduced expression of Ki67) and formation of  $\beta$ (III)-tubulin-positive neurons. (**Supplementary Figure**  
164 **6a**).

165

166 We performed calcium imaging using the fluorescent calcium indicator Fluo-4 to record spontaneous  
167 activity in differentiating ReNcell VM cultures at days 1, 3 and 5, and employed cross-correlation analysis  
168 to infer functional connectivity in the networks (**Figure 4a, Supplementary Figure 7**). Analysis of functional  
169 networks revealed that cultures at day 3 had significantly more activity than those at days 1 and 5, as  
170 measured by the fraction of active cells (**Figure 4b, Supplementary Videos 3-6**). Interestingly, the  
171 functional network was not restricted to cells with short intercellular distances, with cells in the whole

172 field of view (832 $\mu$ m x 702 $\mu$ m) having highly correlated calcium activity (**Figure 4c**). Further, cultures at  
 173 day 3 displayed waves of calcium activity propagating through many neighboring cells, that were not seen  
 174 at later time points (**Supplementary Video 5**). When maintained in proliferation medium, ReNcell VM  
 175 cultures continued to divide and did not differentiate into neurons (**Supplementary Figure 6b**). Further,  
 176 the level of spontaneous activity in proliferation medium remained constant through day 5 of  
 177 measurement, indicating that the trends in functional network activity seen in differentiating cultures was  
 178 unique to the formation of neural networks (**Supplementary Figure 6c**).

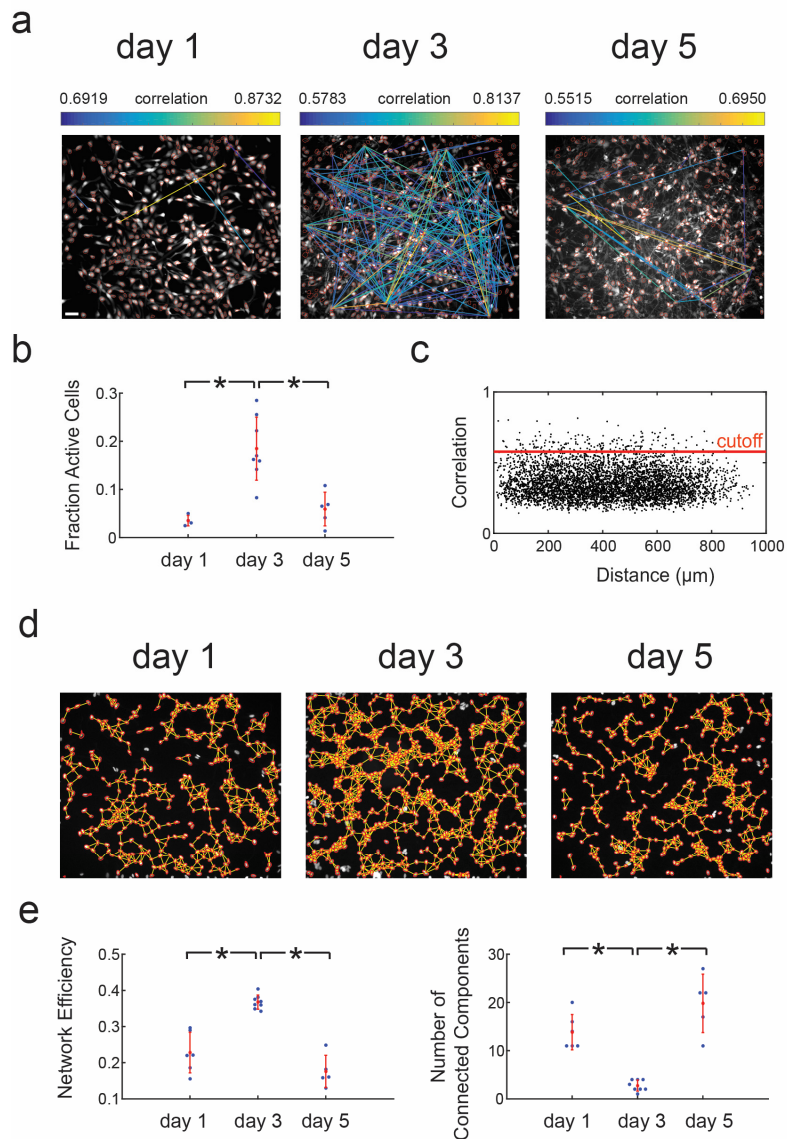

**Figure 4. Functional and spatial networks in ReNcell VM NPCs.** **(a)** Functional networks obtained through calcium imaging with Fluo-4 in developing NPC networks at days 1, 3 and 5. Correlations between cells are shown as a network plot overlaid on the maximum intensity image from calcium image sequences; scale bar = 50 $\mu$ m. **(b)** Fraction of active cells in the network. Active cells are defined as cells whose normalized fluorescence traces have three or more calcium transients; \* $p < 0.005$  from two-sample t-test. **(c)** Plot of correlation versus intercellular distance for day 3 network shown in (a). Correlation threshold generated from shuffled dataset is shown as a red line. **(d)** Spatial networks overlaid on immunofluorescence images of nuclei stained with Hoescht dye; scaling factor = 3. The nucleus images correspond to the images shown in (a). **(e)** Network efficiency of spatial networks peaks at day 3. Number of connected components shows the inverse trend. Sample sizes: Day 1 (n=5); Day 3 (n=8); Day 5 (n=5) for all plots. Red notches show mean and standard deviation; \* $p < 0.00029$  from two-sample t-test (significance threshold adjusted using Bonferroni correction for 17 statistical tests to  $0.005/17 = 0.00029$ ). All microscope images are displayed with enhanced contrast for easy visualization.

179 We next built spatial graphs using nucleus images from the same cultures in which calcium imaging was  
180 performed (**Figure 4d**). Spatial networks were most efficient at day 3 with the fewest number of  
181 connected components (**Figure 4e**). The rise and fall of network efficiency in ReNcell VM networks  
182 mirrored the trends seen in hNP1 networks, with the time course of the trends indicative of network  
183 maturation (**Supplementary Video 7**). Further, the peak in spatial network efficiency coincided with the  
184 most active functional networks. This leads us to conclude that the high spatial efficiency of NPC networks  
185 at intermediate time points of differentiation facilitates high levels of network-wide spontaneous activity.

186

187 **Table 2. Metrics describing local network features, calculated at the level of individual cells.**

| <b>Graph Metrics</b>               | <b>Symbol</b> | <b>Definition</b>                                                                                                       |
|------------------------------------|---------------|-------------------------------------------------------------------------------------------------------------------------|
| <b>Degree</b>                      | $k$           | Number of neighbors (one link away)                                                                                     |
| <b>Average Neighbor Degree</b>     | $k_n$         | Average degree of all neighboring cells                                                                                 |
| <b>Clustering Coefficient</b>      | $C$           | Fraction of total possible links among the neighbors of a node that are actually present, averaged across all neighbors |
| <b>Local Efficiency</b>            | $E_l$         | Average shortest path length in local neighborhood                                                                      |
| <b>Node Closeness Centrality</b>   | $c_n$         | Sum of reciprocal distances to all other nodes                                                                          |
| <b>Node Betweenness Centrality</b> | $w_n$         | Number of shortest paths that pass through the node                                                                     |

188

## 189 Single-cell analysis of developing neural networks

190 To identify the spatial and functional roles of different cell types in developing neural networks, we used  
 191 neural stem cells derived from the NCRM-5 human iPSC line<sup>28</sup>. NCRM-5 NSC cultures differentiated into  
 192 dense networks of neurons over a period of 28 days (**Supplementary Figure 8**).

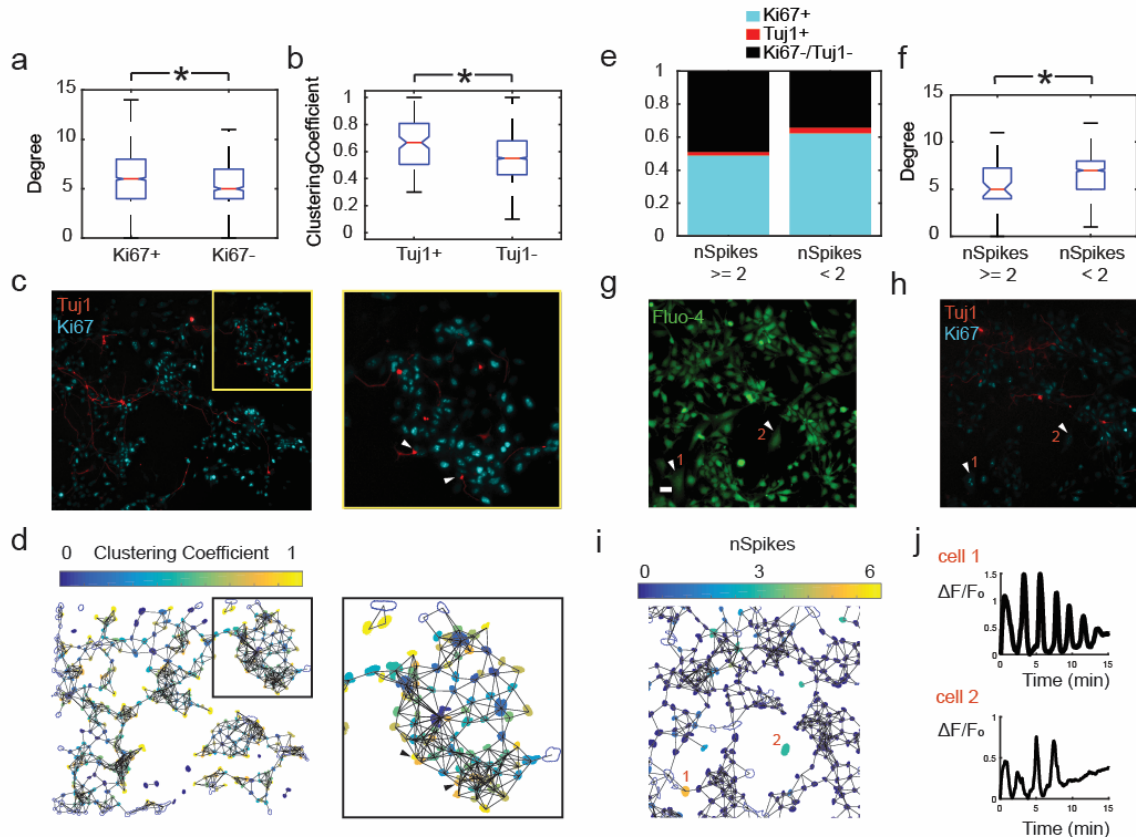

**Figure 5. Multiparametric single-cell analysis of day 3 NCRM-5 NSC cultures.** (a) Boxplot of degree versus Ki67 status. Ki67+ cells have higher degree than Ki67- cells. (b) Boxplot of clustering coefficient versus Tuj1 status. Tuj1+ cells have higher clustering coefficient than Tuj1- cells. (c) Immunofluorescence image of day 3 NCRM-5 NSC culture with Tuj1 and Ki67 stains; scale bar - 50 $\mu$ m. Inset is shown in yellow box with arrows pointing to Tuj1+ neurons at the network periphery. (d) Clustering coefficient of individual cells shown as a heatmap with spatial network overlaid; scaling factor = 3. Nucleus (DAPI) images corresponding to (c) were used to create the spatial graph. Inset shows the same cells as inset in (c). Arrows point to Tuj1+ neurons at the network periphery with high clustering coefficient. (e) Proportions of cell types comprising high-spiking versus low-spiking calcium imaging. (f) Boxplot of degree versus spiking characteristics. High-spiking cells have lower degree than low-spiking cells. (g) Frame from calcium imaging sequence for day 3 NCRM-5 NSC culture; scale bar - 25 $\mu$ m. Arrows point to high-spiking, morphologically distinct cells with few neighbors. (h) Immunofluorescence image corresponding to (g) identifying Tuj1+ and Ki67+ cell types. (i) Heatmap of number of spikes of spontaneous calcium activity within a representative 15 min imaging window with spatial network overlaid. (j) Calcium traces from two high-spiking cells. \* $p < 0.0071$  from two-sample t-test (significance threshold adjusted using Bonferroni correction for 7 statistical tests to  $0.05/7 = 0.0071$ ).

193 We next performed immunostaining for proliferating cells (Ki67) and new neurons ( $\beta$ (III)-tubulin/Tuj1) at  
194 day 3 of differentiation and leveraged the graph theoretic approach to evaluate spatial features of  
195 individual cells (**Table 2**). This analysis revealed that Ki67+ proliferating cells had a high degree or number  
196 of neighbors compared to Ki67- non-proliferating cells in NCRM-5 cultures (**Figure 5a**). Further, Tuj1+  
197 neurons had a high clustering coefficient compared to Tuj1- cells in differentiating NCRM-5 NSCs (**Figure**  
198 **5b-d**). Cells with high clustering coefficient are likely to be part of cliques, a common feature of cells at  
199 the edge of clusters due to geometric constraints (**Figure 5d**). Thus, our results suggest that proliferating  
200 cells tend to be close to the center of clusters where they are surrounded by many neighbors, while newly  
201 born neurons are found mostly at the edge of clusters.

202 In order to investigate the functional role of individual cells, we performed calcium imaging using Fluo-4  
203 on day 3 cultures, followed by immunostaining and co-registration of the immunostain image with the  
204 calcium video (**Figure 1b, Supplementary Video 8-10**). This analysis revealed that high-spiking cells had a  
205 greater proportion of Tuj1-/Ki67- cells and a lower degree than low-spiking cells (**Figure 5e,f**). Through  
206 visual inspection, this high-spiking population of cells exhibited qualitatively larger morphologies (**Figure**  
207 **5g-j**).

208

### 209 **Analysis of a neurodevelopmental disease model reveals aberrant network features.**

210 To validate our network model for applications to study diseases, we performed spatial network analyses  
211 using an iPSC disease model of Smith-Lemli-Opitz syndrome (SLOS), an autosomal recessive  
212 developmental disorder resulting from mutations in *DHCR7* which produces pronounced neurological  
213 deficits<sup>29</sup>. Previous studies have shown accelerated differentiation of neural progenitors derived from  
214 patients with SLOS<sup>22</sup>, likely caused by decreased activity of the canonical Wnt/ $\beta$ -catenin signaling pathway  
215 in these cells.



216 Here, we compared the global and individual cell spatial features of day 3 differentiating cultures of  
 217 control (NCRM-5) and SLOS iPSC-derived NSCs (CWI 4F2). At the global level, CWI 4F2 cultures were more  
 218 homogeneous than NCRM-5 cultures, as indicated by the presence of fewer connected components and  
 219 lower network heterogeneity (Figure 6a-d, Table 1).

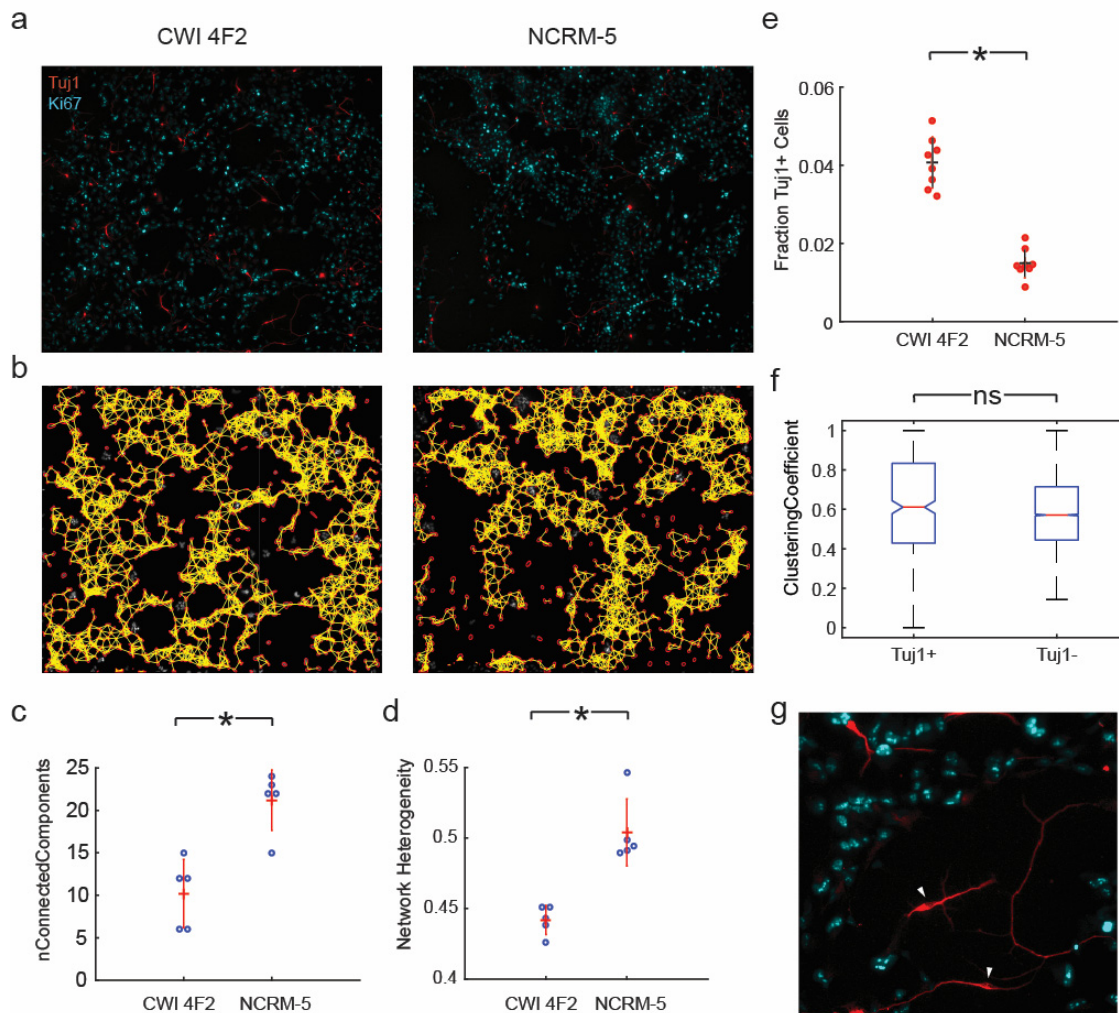

**Figure 6. Spatial network analysis of iPSC-derived NSCs reveals deficits in network connectivity in a neurodevelopmental disorder model. (a)** Immunostained images from day 3 cultures of CWI 4F2 SLOS NSCs and control NCRM-5 NSCs; scale bar = 50  $\mu$ m. **(b)** Nuclei stained by DAPI corresponding to images in (a), with spatial graph overlay; scaling factor = 3. **(c)** Number of connected components in NCRM-5 cultures is higher than CWI 4F2. **(d)** Network heterogeneity of NCRM -5 cultures is higher than CWI 4F2; \* $p < 0.0029$  from two-sample t-test (significance threshold adjusted using Bonferroni correction for 17 statistical tests to  $0.05/17 = 0.0029$ ). **(e)** CWI 4F2 NSCs exhibit accelerated differentiation into Tuj1+ neurons compared to NCRM-5 NSCs. **(f)** Clustering coefficient of Tuj1+ cells shows no difference to that of Tuj1- cells in day 3 CWI 4F2 cultures. **(g)** Portion of differentiating CWI 4F2 NSCs immunostained image in (a), with arrows pointing to disconnected Tuj1+ neurons contributing to low clustering coefficient in CWI 4F2 cultures.

220 Our analyses both confirmed accelerated neural specification in CWI 4F2 cultures through day 3 and  
221 revealed that Tuj1+ neurons in day 3 CWI 4F2 cultures did not have a high clustering coefficient compared  
222 to Tuj1-cells, as was the case in NCRM-5 cultures (**Figure 6e, f**). This was due to the presence of many  
223 more ‘lone’ neurons with higher neurite extensions in the CWI 4F2 cultures (**Figure 6g**). Thus, network  
224 analysis revealed the presence of global and local features of spatial organization in neural cell types in a  
225 neurodevelopmental disorder, validating the utility of the Living Neural Network model for the study of  
226 neurological diseases.

227

## 228 **DISCUSSION**

229 Topological and functional analysis of *in vitro* neural networks has the potential to uncover basic  
230 organizational principles of their *in vivo* counterparts. Our study provides a new approach which leverages  
231 the directed differentiation of human stem cells to study the self-assembly of *in vitro* neural networks  
232 from neural progenitor cells. We quantified the spatial organization of immature neural cells during  
233 differentiation, using a unique application of graph theory. The experimental paradigm presented here  
234 enabled us to uncover relationships between spatial topology of NPC communities and functional  
235 maturation of developing neural circuits, and allowed us to develop hypotheses about the role of certain  
236 topologies on NPC function.

237

238 Because chemical and electrical signaling between neural progenitor cells often involves direct contact  
239 between adjacent cells, we expect spatial cell organization to be an important aspect of neural  
240 development. Two examples where spatial organization would play a role include Notch/Delta signaling  
241 and gap junctional communication between cells. The Notch/Delta signaling pathway, which influences  
242 the proliferation and neuronal fate commitment of progenitor cells<sup>30,31</sup>, is an example of juxtacrine

243 chemical signaling. The canonical Notch signaling pathway functions through the binding of a  
244 transmembrane ligand on one cell with the transmembrane receptor on a contacting cell, resulting in the  
245 release of the notch intracellular domain (NICD) to initiate downstream signaling cascades in the  
246 contacting cell<sup>32</sup>. In addition, immature neural circuits are known to display spontaneous electrical  
247 activity, which is an important aspect of their proper development<sup>13,14</sup>. Gap junctions or electrical  
248 synapses allow direct access between cells and result in exchange of ions and growth factors, and these  
249 are known to be important in the propagation of spontaneous electrical activity. Indeed, neural progenitor  
250 cells have been shown to display structured and synchronous calcium activity, which depends on gap  
251 junctions and which promotes cell proliferation<sup>12</sup>. More broadly, structured cell-cell communication has  
252 been implicated in coordinated chemosensing<sup>33</sup> and migration during development<sup>34</sup>. Thus, the methods  
253 of cell-cell communication employed by immature neural cells indicate the significance of spatially  
254 organized electrical and chemical signaling.

255

256 We found that the rise and fall in spatial network efficiency was a reproducible feature in NPC networks,  
257 and believe this is a characteristic feature of the transition from immature NPC networks to mature  
258 neuronal networks. Global network efficiency is low in proliferating NPC topologies, rises to a peak in  
259 intermediate cultures, and then drops off as cells mature into neuronal networks. The trend in network  
260 efficiency is intuitively explained by its negative correlation with the number of connected components,  
261 a measure of cell connectivity. Cell proliferation in the early stages of differentiation causes the merging  
262 of many disconnected clusters of cells into a giant connected component, which leads to a rise in the  
263 overall spatial connectivity and reduction in the average path length. The reorganization of the giant  
264 component into smaller modules at later stages leads to a reduction in network efficiency.

265

266 Of particular developmental importance, we determined the peak of spatial network efficiency coincides  
267 with the appearance of electrophysiologically mature neurons in culture and high levels of spontaneous  
268 network-wide calcium activity, respectively, in the cell lines we studied (hNP1 and ReNcell VM cells).  
269 Additionally, levels of spontaneous activity drop off in more mature cultures which have significant neurite  
270 outgrowth and more clustered cell bodies. The spatial and functional architecture of mature cultures is  
271 consistent with previous evidence of highly clustered units developing in neuronal cultures<sup>5-7</sup>. The  
272 reduction in network-wide spontaneous activity in more mature cultures is consistent with a transition  
273 from a global to a hierarchical structure of communication.

274

275 By adapting the graph-based approach at the single-cell level, we also found that specific cell types have  
276 unique spatial coordinates in developing NSC cultures derived from human iPSCs. We found that Ki67+  
277 proliferating cells had a higher average number of neighbors than non-proliferating cells and newly born  
278 Tuj1+ neurons had high clustering coefficients indicative of their locations at the culture periphery. These  
279 results correspond to previously observed features of polarized neuroepithelium – prevalence of mitosis  
280 near the lumen and migration of differentiated cells to the periphery<sup>19</sup>. Further, by coupling calcium  
281 imaging experiments with spatial analysis of specific cell types, we found that high-spiking cells tend to  
282 have reduced numbers of neighbors and have a higher proportion of Tuj1-/Ki67- cells. Through visual  
283 inspection, we observed these cells had large morphologies. Based on their morphological and spatial  
284 properties, we hypothesize this cell population may represent a basal progenitor cell population  
285 previously observed in differentiating NSC cultures<sup>19,35</sup>.

286

287 We then leveraged spatial network analysis to uncover features of aberrant neural networks in an iPSC  
288 model of a neurodevelopmental disorder, Smith-Lemli-Opitz syndrome. Global network analysis  
289 demonstrated that developing SLOS cultures were more homogeneous than control NCRM-5 cultures at

290 the same stage of differentiation. We believe this indicates that normal differentiation is characterized by  
291 the presence of NSC clusters of a wide size distribution, a feature that is disrupted in SLOS. Further, the  
292 higher number of neurons in SLOS cultures comprised a large number of 'lone' cells with high neurite  
293 extension. While the mechanisms underlying altered neural networks in SLOS are unclear, published  
294 findings related to cytoskeletal remodeling or diminished  $\beta$ -catenin signaling affecting cadherin function  
295 are possibilities<sup>22,36</sup>.

296

297 In this study, we show that network analysis provides unique information about the structure of neural  
298 progenitor cell communities at the local and global levels. It remains to be seen whether spatial topology  
299 of developing cultures is predictive of synaptic connectivity in mature neuronal networks. Several *in vivo*  
300 studies have provided evidence for a structure-functional relationship between adult neuronal wiring and  
301 the spatiotemporal origin of the constituent neurons. For example, sister excitatory neurons in the  
302 neocortex are more likely to develop synapses with each other rather than with other cells<sup>37</sup>, and the  
303 electrophysiological phenotypes of GABAergic interneurons have been shown to depend on the time and  
304 place of their birth<sup>38</sup>. Thus, the analysis of spatial topology in developing neuronal circuits in a controlled  
305 setting has the potential to uncover structure-function relationships in the resulting mature neural  
306 circuits.

307

308 The present study also lays the foundation for analysis of the role of cellular neighborhood on cell fate  
309 determination of individual progenitor cells. The expression of cell-fate determination factors such as  
310 bHLH transcription factors like Hes1 and Ngn2, and proteins involved in cell-cell communication pathways  
311 such as Notch/Delta proteins, have been shown to be tightly coupled with each other<sup>17,39</sup>. Computational  
312 modeling studies have predicted that Notch-Hes1 intercellular signaling affects differentiation and cell  
313 cycle progression of individual cells and this signaling is important for the maintenance of an optimal

314 balance between differentiating cells and self-renewing progenitor cells<sup>40</sup>. The spatial dynamics of cell-  
315 cell signaling and its impact on single-cell differentiation status is an intriguing subject for future study.

316

317 In conclusion, we present a multiplexed approach integrating long-term imaging, automated image  
318 analysis, and graph theory to quantify the spatial and functional networks of neural progenitors during  
319 neural differentiation. The Living Neural Networks method introduces a tangible means to test theories  
320 about different forms of neural cell communication and their role in shaping functional neural networks.  
321 Insights from this study help further our understanding of the fundamental design features of the brain.

322

## 323 **METHODS**

324 **Cell culture.** Human neural progenitor cells (hNP1) derived from H9 human embryonic stem cells were  
325 obtained from Aruna Biomedicals (Athens, GA). Cells were expanded on tissue culture flasks pre-coated  
326 with either fibronectin (Sigma-Aldrich) or Matrigel (BD Biosciences), in proliferation medium consisting of  
327 AB2 basal neural medium, ANS neural supplement (both supplied by manufacturer), 10 ng/ml leukemia  
328 inhibitory factor (LIF; EMD Millipore), 20 ng/ml basic fibroblast growth factor (bFGF; R&D Systems), 2 mM  
329 GlutaMAX supplement (Life Technologies) and penicillin/streptomycin (Life Technologies). For neural  
330 differentiation experiments, cells were cultured in medium lacking bFGF.

331

332 ReNcell VM immortalized human neural progenitor cells derived from the ventral mesencephalon of  
333 human fetal brain were purchased from EMD Millipore. Cells were expanded on tissue culture flasks  
334 coated with laminin (Life Technologies), in media containing DMEM/F12 (Life Technologies),  
335 supplemented with B27 (Life Technologies), 2 µg/ml heparin (StemCell Technologies), 20 ng/ml bFGF  
336 (EMD Millipore), 20 ng/ml EGF (Sigma) and penicillin/streptomycin (Life Technologies). For differentiation  
337 experiments, cells were cultured in medium lacking bFGF and EGF.

338

339 Neural stem cells were derived from two human iPSC lines, NCRM-5 and CWI 4F2, following published  
340 protocols<sup>22</sup> (**Supplementary Table 3**). NSCs were cultured on dishes coated with Poly-L-Ornithine and  
341 Laminin, in media containing DMEM/F12 (Life Technologies), B27 without vitamin A (Life Technologies),  
342 20 ng/mL EGF (Sigma), 20 ng/mL bFGF (Stemgent) and penicillin/streptomycin (Life Technologies). NSCs  
343 were passaged using Accutase (Life Technologies) in medium containing 10  $\mu$ m ROCK inhibitor (Y276332;  
344 Reagents Direct). Differentiation experiments were carried out in differentiation medium containing  
345 Neurobasal media (Life Technologies), B27 with Vitamin A (Life Technologies), 10 ng/mL BDNF  
346 (Peprotech), 10 ng/mL GDNF (Peprotech), GlutaMAX supplement (Life Technologies) and  
347 penicillin/streptomycin (Life Technologies). The NCRM-5 and CWI 4F2 iPSC lines were originally derived  
348 within the intramural program of the National Heart, Lung, and Blood Institute (NHLBI iPSC Core) and the  
349 Eunice Kennedy Shriver National Institute of Children's Health and Human Development (laboratory of  
350 Forbes D. Porter).

351

352 **Electrophysiology.** For whole-cell patch clamp experiments, cultures were maintained in extracellular  
353 recording solution containing 119 mM NaCl, 5 mM KCl, 10 mM HEPES, 2 mM CaCl<sub>2</sub> and 1 mM MgCl<sub>2</sub>,  
354 titrated to a pH of 7.3. Pipettes (5-10 M $\Omega$ ) were pulled from standard borosilicate glass capillaries and  
355 back filled with intracellular recording solution containing 8 mM NaCl, 10mM KCl, 5 mM HEPES, 0.06 mM  
356 CaCl<sub>2</sub>, 5 mM MgCl<sub>2</sub>, 130 mM potassium gluconate and 0.6mM EGTA, titrated to a pH of 7.4. Recordings  
357 were performed using a MultiClamp 700A amplifier and a Digidata 1550 Data Acquisition System coupled  
358 with Clampex 10.4 software (Molecular Devices). Traces were analyzed in MATLAB.

359

360 In voltage-clamp experiments, cells were held at a holding potential of -50 mV and given a series of voltage  
361 steps from -90 to +100 mV. In current-clamp experiments, cells were held at approximately -70 mV

362 through minimal current injection before application of a series of current steps ranging from -40 to +120  
363 pA. Magnitudes of the current steps were modified according to the input resistance. Peak outward  
364 current amplitude was measured 40 ms after the initiation of the voltage sweep. Peak inward current was  
365 defined as the maximum transient negative current at any command voltage.

366

367 **Immunocytochemistry.** Cells plated on chambered cover glasses (Fisher Scientific) or glass coverslips were  
368 fixed in 4% PFA for 20 min, washed with PBS and incubated with blocking buffer containing 0.2% Triton-X  
369 (Sigma), 0.3M glycine and 10% goat serum (Jackson ImmunoResearch Labs) for 1 hour. Cells were then  
370 incubated overnight in the following primary antibodies diluted in 10% goat serum: Mouse Nestin (1:200,  
371 Neuromics), Rabbit MAP2 (1:500, Millipore), Mouse Tuj1 (1:2000, Millipore), Rabbit Ki67 (1.43 $\mu$ L/mL,  
372 Abcam). Cells were rinsed and primary antibodies were detected using appropriate Alexa Fluor secondary  
373 antibodies. Nuclei were stained using either Hoescht or DAPI.

374 See **Supplementary Table 2** for a list of antibodies and dilutions.

375

376 **Image acquisition and segmentation.** For live imaging experiments, hNP1 cells were plated at  
377 approximately 50% confluence on 12-well plates pre-coated with Matrigel and switched to differentiation  
378 medium 24 hours post-plating. Two datasets (biological replicates) were obtained by imaging the well  
379 plates at days 0, 3, 6, 9, 12 and 14 after withdrawal of bFGF from culture medium, using an automated  
380 stage Nikon Eclipse Ti-E Microscope. At the start of the experiment, five locations were chosen arbitrarily  
381 for each well, and the same locations were located and imaged at each time point. Imaging sessions lasted  
382 about 10 minutes and the plates were returned to the incubator after imaging. We also performed  
383 continuous imaging (**Supplementary Video 1**), for which the well plate was mounted on the stage of the  
384 microscope in a bold line cage incubator (Okolab) equipped with temperature control and gas flow rate  
385 control enabling a 37°C 5% CO<sub>2</sub> environment. Images were acquired at 1-hour intervals for 8 days. In all



386 time-lapse imaging experiments, 8-bit phase contrast images were acquired through a 10X objective (N.A.  
387 = 0.3) from a 1280 x 1080 pixel field of view using a Nikon DS-Qi1 camera. Physical pixel size was 0.64  $\mu\text{m}$ .

388

389 Phase contrast image sequences were chosen for analysis based on the ability of a human observer to  
390 distinguish cellular features in the images. Images with large amounts of debris occluding cells were  
391 discarded manually. In this manner, a total of 16 and 14 image sequences (30 locations) for each of the 2  
392 biologically independent datasets were chosen for analysis.

393

394 Selected grayscale images were pre-processed by applying a median filter with a neighborhood of 3x3  
395 pixels to remove noise and segmented using an unbiased intensity-gradient thresholding approach<sup>41</sup>.  
396 Starting from the grayscale image, the first derivative of the pixel intensity histogram was calculated.  
397 Fitting a linear function to the ascending portion of the first derivative and extrapolating to the x-axis  
398 resulted in a grayscale threshold, which was used to generate a binary image distinguishing cellular  
399 features from the background. Morphological operations performed on the binary image were:

- 400 1. Small objects of size lesser than 50 pixels were removed to filter out noise and other imaging  
401 artifacts.
- 402 2. Morphological opening was performed using a disk structuring element of radius 4 pixels. This  
403 was done to separate linear features (neurites), and circular features (cell bodies).
- 404 3. Cell bodies were separated using connected component labeling using the default 8-connected  
405 neighborhood.
- 406 4. Cell body objects smaller than 150 pixels and those touching the image border were removed.

407 All parameters used in phase contrast image processing are listed in **Supplementary Table 1**.

408

409 In order to quantify the accuracy of our image processing algorithms, we compared the results with  
410 manual tracing of soma. These results showed a close agreement between the numbers of cells detected  
411 by our algorithm and by manual tracing at different time points (**Supplementary Figure 1**).

412

413 **Calcium imaging and analysis.** Cells were plated on LabTek chambered cover glasses for calcium imaging  
414 experiments. Cells were loaded with culture medium containing 3  $\mu$ M of the fluorescent calcium indicator  
415 Fluo-4/AM (Life Technologies) and Pluronic F-127 (0.2% w/v, Life Technologies) for 30 min at 37°C.  
416 Imaging of spontaneous calcium activity was performed at 37°C using a 20X objective lens (N.A. = 0.75),  
417 with 488 nm excitation provided through a SOLA SE Light Engine (Lumencor). 16-bit fluorescence images  
418 were acquired at a sampling frequency of 1 Hz for a total duration of 15 min, using a Zyla 5.5 sCMOS  
419 camera (Andor).

420

421 Following calcium imaging, samples were subjected to immunocytochemistry as described earlier. By  
422 navigating to the locations where calcium imaging was performed, manual co-registration was done to  
423 obtain immunofluorescence images for the same fields of view.

424

425 **Generation of functional networks from calcium imaging.** Regions of interest (ROIs) were obtained by  
426 segmenting nucleus images using a local thresholding approach followed by the watershed algorithm.  
427 Undersegmented objects were algorithmically removed by discarding the top two percentile of object  
428 sizes obtained after segmentation.

429

430 Next, a time-varying fluorescence trace was calculated for each ROI. For each frame in the calcium  
431 fluorescence image stack, background (average pixel intensity of non-ROI regions in the image) was  
432 subtracted. Average fluorescence intensity for each ROI ( $F$ ) was obtained by averaging pixel intensity

433 values within the ROI for each time point. Baseline fluorescence ( $F_0$ ) for each ROI was calculated as the  
434 minimum intensity value in a window 90s before and after each time point. The normalized fluorescence  
435 trace for the ROI was then calculated as  $F - F_0/F_0$ . Cells with low activity were filtered out by discarding  
436 traces with less than three peaks and traces whose signal-to-noise ratio was lower than 1. Quality of the  
437 remaining traces was confirmed by manual inspection. This was done to avoid false positives in the cross-  
438 correlation analysis.

439  
440 Functional networks were created following the method described by Smedler et al<sup>42</sup>, where cross-  
441 covariance between signals is used to assign functional connections between pairs of cells. A randomized  
442 dataset was generated by shuffling each signal in the original dataset at a random time point. The 99<sup>th</sup>  
443 percentile of cross-covariance values for the randomized dataset was used as a threshold for determining  
444 significant correlations.

445  
446 **Creation of spatial graphs.** Spatial graphs were created from microscope images using cytoNet, software  
447 developed in-house<sup>43</sup>. For each pair of objects (soma/nuclei), a threshold distance for proximity was  
448 defined as the average of the two object diameters, multiplied by a scaling factor (S). If the Euclidean  
449 distance between the object centroids was lower than the threshold distance computed, then the pair of  
450 objects was connected with a “proximity edge” (**Figure 2j, k**). We chose a scaling factor of 2 for phase  
451 contrast images and 3 for nucleus immunofluorescence images based on similarity in network density for  
452 the resulting networks (**Supplementary Figure 2**).

453 Due to the high density of NCRM-5 cultures, quantification of global network metrics proved unfeasible  
454 (**Supplementary Figure 8**). However, qualitatively we observed the prevalence of highly clustered cell  
455 bodies at late stages of differentiation.

456 **Metric computation.** All the network metrics described in Table 1 were computed using cytoNet. It is to  
457 be noted that not all metrics derived from graph theory have a ready biological interpretation, especially  
458 in the context of spatial graphs. For example, interpretation of metrics like degree-degree correlations  
459 and rich-club metric (**Supplementary Figure 4**) are limited, due to the implicit limit in the type of  
460 connections that are possible in spatial graphs. Keeping this in mind, we focused on analyzing metrics with  
461 an intuitive biological interpretation, i.e., information flow and connectivity.

462  
463 Random graphs were constructed through degree-preserving rewiring, maintaining the degree  
464 distribution of the original graph (**Supplementary Figure 3**). Each link (edge) belonging to any given node  
465 in the original graph was randomly re-assigned to a node that was chosen from all possible nodes with  
466 uniform probability. Metrics computed for random graphs were averaged across 100 different realizations  
467 of the random graphs. This mode of random graph generation was chosen to eliminate finite-size effects  
468 inherent in other models of random graphs such as Erdős-Rényi random graphs. To ensure robustness of  
469 the network metrics, we tested varying fields of view for the images, and confirmed the trends remained  
470 consistent (**Supplementary Figure 5**).

471  
472 **Single-cell analysis.** Consolidated multi-parametric datasets were obtained by performing calcium  
473 imaging followed by immunocytochemistry (**Supplementary Videos 8-10**). Functional data obtained  
474 through calcium imaging (e.g., number of spikes) was combined with cell identity information obtained  
475 through immunostaining (e.g., Ki67, Tuj1 status), and spatial features extracted using nuclei as described  
476 earlier. Cells within 100 pixels of the border of the field of view were excluded from analysis to eliminate  
477 border effects. Occasionally, colonies of cells were washed away during the immunostaining process. In  
478 these cases, the calcium imaging channel was used to obtain an approximate mask of such cells in order

479 to obtain a complete image set for spatial analysis. Additionally, large masks likely representing  
480 undersegmented objects were excluded from analysis.

481

482 **Code and data availability.** All MATLAB code and data that support the findings of this study are available  
483 from the corresponding author upon request. The cytoNet user interface can be found at  
484 <http://qutublab.rice.edu/cytoNet/>

485

#### 486 **ACKNOWLEDGEMENTS**

487 We thank Dr. Byron Long, Dr. David Noren, Dr. André Schultz, Chenyue Wendy Hu and Dr. Ka Wai Lin for  
488 helpful discussions and comments on the manuscript, Hanyang Li and Kylie Balotin for assistance with  
489 manual tracing of cells, Daniel Murphy and Dr. Guillaume Duret for technical assistance. This work was  
490 supported by NSF Career Grant 1150645 to A.A.Q., NSF Neural and Cognitive Systems grant 1533708 to  
491 A.A.Q. and J.T.R., and NIH grant 5P20GM103620 to K.R.F. A.S.M. was supported through NSF IGERT  
492 training grant 1250104.

493

#### 494 **AUTHOR CONTRIBUTIONS**

495 All authors designed the experiments. A.S.M. performed the experiments. A.A.Q., A.S.M. and N.E.G.  
496 analyzed the data. All authors contributed to writing the manuscript. A.A.Q. and J.T.R. supervised the  
497 work. K.R.F supplied iPSC-derived NSC lines and supervised neural differentiation experiments.

498

#### 499 **COMPETING FINANCIAL INTERESTS**

500 The authors declare no competing financial interests.

501

502 **REFERENCES**

- 503 1. Bullmore, E. & Sporns, O. Complex brain networks: graph theoretical analysis of structural and  
504 functional systems. *Nat Rev Neurosci* **10**, 186–198 (2009).
- 505 2. Bassett, D. S. & Sporns, O. Network neuroscience. *Nat. Neurosci.* **20**, 353–364 (2017).
- 506 3. Schröter, M., Paulsen, O. & Bullmore, E. T. Micro-connectomics: probing the organization of  
507 neuronal networks at the cellular scale. *Nat. Rev. Neurosci.* **18**, 131–146 (2017).
- 508 4. Feldt, S., Bonifazi, P. & Cossart, R. Dissecting functional connectivity of neuronal microcircuits:  
509 experimental and theoretical insights. *Trends Neurosci.* **34**, 225–36 (2011).
- 510 5. Shefi, O., Ben-Jacob, E. & Ayali, A. Growth morphology of two-dimensional insect neural  
511 networks. *Neurocomputing* **44–46**, 635–643 (2002).
- 512 6. de Santos-Sierra, D. *et al.* Emergence of small-world anatomical networks in self-organizing  
513 clustered neuronal cultures. *PLoS One* **9**, e85828 (2014).
- 514 7. Downes, J. H. *et al.* Emergence of a small-world functional network in cultured neurons. *PLoS*  
515 *Comput. Biol.* **8**, e1002522 (2012).
- 516 8. Lefort, S., Tomm, C., Floyd Sarria, J.-C. & Petersen, C. C. H. The Excitatory Neuronal Network of  
517 the C2 Barrel Column in Mouse Primary Somatosensory Cortex. *Neuron* **61**, 301–316 (2009).
- 518 9. Yassin, L. *et al.* An Embedded Subnetwork of Highly Active Neurons in the Neocortex. *Neuron* **68**,  
519 (2010).
- 520 10. Gal, E. *et al.* Rich cell-type-specific network topology in neocortical microcircuitry. *Nat. Neurosci.*  
521 **20**, 1004–1013 (2017).
- 522 11. French-Constant. The neural stem cell microenvironment. *StemBook* 1–26 (2008).  
523 doi:10.3824/stembook.1.15.1
- 524 12. Malmersjö, S. *et al.* Neural progenitors organize in small-world networks to promote cell  
525 proliferation. *Proc. Natl. Acad. Sci. U. S. A.* **110**, E1524-32 (2013).
- 526 13. Spitzer, N. C. Electrical activity in early neuronal development. *Nature* **444**, 707–12 (2006).

- 527 14. Blankenship, A. G. & Feller, M. B. Mechanisms underlying spontaneous patterned activity in  
528 developing neural circuits. *Nat. Rev. Neurosci.* **11**, 18–29 (2010).
- 529 15. Watters, A. K. *et al.* Identification and dynamic regulation of tight junction protein expression in  
530 human neural stem cells. *Stem Cells Dev.* **24**, 1377–89 (2015).
- 531 16. Edri, R. *et al.* Analysing human neural stem cell ontogeny by consecutive isolation of Notch active  
532 neural progenitors. *Nat. Commun.* **6**, 6500 (2015).
- 533 17. Shimojo, H., Ohtsuka, T. & Kageyama, R. Oscillations in Notch Signaling Regulate Maintenance of  
534 Neural Progenitors. *Neuron* **58**, 52–64 (2008).
- 535 18. Suzuki, I. K. & Vanderhaeghen, P. Is this a brain which I see before me? Modeling human neural  
536 development with pluripotent stem cells. *Development* **142**, 3138–3150 (2015).
- 537 19. Shi, Y., Kirwan, P., Smith, J., Robinson, H. P. C. & Livesey, F. J. Human cerebral cortex  
538 development from pluripotent stem cells to functional excitatory synapses. *Nat. Neurosci.* **15**,  
539 477–86, S1 (2012).
- 540 20. Shen, Q. *et al.* The timing of cortical neurogenesis is encoded within lineages of individual  
541 progenitor cells. *Nat. Neurosci.* **9**, 743–751 (2006).
- 542 21. Chailangkarn, T. *et al.* A human neurodevelopmental model for Williams syndrome. *Nature* **536**,  
543 338–343 (2016).
- 544 22. Francis, K. R. *et al.* Modeling Smith-Lemli-Opitz syndrome with induced pluripotent stem cells  
545 reveals a causal role for Wnt/ $\beta$ -catenin defects in neuronal cholesterol synthesis phenotypes.  
546 *Nat. Med.* **22**, 388–396 (2016).
- 547 23. Gage, F. H. Mammalian Neural Stem Cells. *Science (80-. )*. **287**, 1433–1438 (2000).
- 548 24. Bounova, G. & De Weck, O. Overview of metrics and their correlation patterns for multiple-  
549 metric topology analysis on heterogeneous graph ensembles. *Phys. Rev. E - Stat. Nonlinear, Soft*  
550 *Matter Phys.* **85**, (2012).

- 551 25. Watts, D. J., Watts, D. J., Strogatz, S. H. & Strogatz, S. H. Collective dynamics of ‘small-world’  
552 networks. *Nature* **393**, 440–2 (1998).
- 553 26. Colizza, V., Flammini, A., Serrano, M. A. & Vespignani, A. Detecting rich-club ordering in complex  
554 networks. **2**, 110–115 (2006).
- 555 27. Newman, M. Assortative Mixing in Networks. *Phys. Rev. Lett.* **89**, 208701 (2002).
- 556 28. Malik, N. *et al.* Comparison of the Gene Expression Profiles of Human Fetal Cortical Astrocytes  
557 with Pluripotent Stem Cell Derived Neural Stem Cells Identifies Human Astrocyte Markers and  
558 Signaling Pathways and Transcription Factors Active in Human Astrocytes. *PLoS One* **9**, e96139  
559 (2014).
- 560 29. Wassif, C. A. *et al.* Mutations in the human sterol delta7-reductase gene at 11q12-13 cause  
561 Smith-Lemli-Opitz syndrome. *Am. J. Hum. Genet.* **63**, 55–62 (1998).
- 562 30. Zhou, Z.-D., Kumari, U., Xiao, Z.-C. & Tan, E.-K. Notch as a molecular switch in neural stem cells.  
563 *IUBMB Life* **62**, 618–623 (2010).
- 564 31. Androutsellis-Theotokis, A. *et al.* Notch signalling regulates stem cell numbers in vitro and in vivo.  
565 *Nature* **442**, 823–826 (2006).
- 566 32. Andersson, E. R., Sandberg, R. & Lendahl, U. Notch signaling: simplicity in design, versatility in  
567 function. *Development* **138**, 3593–3612 (2011).
- 568 33. Sun, B., Lembong, J., Normand, V., Rogers, M. & Stone, H. A. Spatial-temporal dynamics of  
569 collective chemosensing. *Proc. Natl. Acad. Sci. U. S. A.* **109**, 7753–8 (2012).
- 570 34. Friedl, P. & Gilmour, D. Collective cell migration in morphogenesis, regeneration and cancer. *Nat.*  
571 *Rev. Mol. Cell Biol.* **10**, 445–457 (2009).
- 572 35. Arai, Y. & Taverna, E. Neural Progenitor Cell Polarity and Cortical Development. *Front. Cell.*  
573 *Neurosci.* **11**, 384 (2017).
- 574 36. Jiang, X.-S. *et al.* Activation of Rho GTPases in Smith-Lemli-Opitz syndrome: pathophysiological



- 575 and clinical implications. *Hum. Mol. Genet.* **19**, 1347–57 (2010).
- 576 37. Yu, Y.-C., Bultje, R. S., Wang, X. & Shi, S.-H. Specific synapses develop preferentially among sister  
577 excitatory neurons in the neocortex. *Nature* **458**, 501–4 (2009).
- 578 38. Butt, S. J. B. *et al.* The Temporal and Spatial Origins of Cortical Interneurons Predict Their  
579 Physiological Subtype. *Neuron* **48**, 591–604 (2005).
- 580 39. Kageyama, R., Ohtsuka, T., Shimojo, H. & Imayoshi, I. Dynamic regulation of Notch signaling in  
581 neural progenitor cells. *Curr. Opin. Cell Biol.* **21**, 733–740 (2009).
- 582 40. Pfeuty, B. A computational model for the coordination of neural progenitor self-renewal and  
583 differentiation through Hes1 dynamics. *Development* **142**, 477–485 (2015).
- 584 41. Curl, C. *et al.* Quantitative phase microscopy: a new tool for measurement of cell culture growth  
585 and confluency in situ. *Pflügers Arch. - Eur. J. Physiol.* **448**, 462–468 (2004).
- 586 42. Smedler, E., Malmersjö, S. & Uhlén, P. Network analysis of time-lapse microscopy recordings.  
587 *Front. Neural Circuits* **8**, 111 (2014).
- 588 43. Mahadevan, A. S. *et al.* cytoNet: Network Analysis of Cell Communities. *bioRxiv* (2017).
- 589

## Supplementary Information

### Living Neural Networks: Dynamic Network Analysis of Developing Neural Stem Cells

Arun S. Mahadevan, Nicolas E. Grandel, Jacob T. Robinson, Kevin R. Francis, Amina A. Qutub

|                               |                                                                                                   |
|-------------------------------|---------------------------------------------------------------------------------------------------|
| <b>Supplementary Figure 1</b> | Comparison of automated image segmentation and manual tracing of cell soma                        |
| <b>Supplementary Figure 2</b> | Scaling factor analysis                                                                           |
| <b>Supplementary Figure 3</b> | Random graph generation through degree-preserving rewiring                                        |
| <b>Supplementary Figure 4</b> | Trends in network metrics in hNP1 cultures not reported in main text.                             |
| <b>Supplementary Figure 5</b> | Scale invariance of network metrics in hNP1 network analysis                                      |
| <b>Supplementary Figure 6</b> | Immunostaining of ReNcell cultures and functional analysis of cultures with proliferation medium. |
| <b>Supplementary Figure 7</b> | Cross-correlation analysis to infer functional connectivity from calcium imaging data             |
| <b>Supplementary Figure 8</b> | Long-term differentiation of NCRM-5 neural stem cells.                                            |
| <b>Supplementary Table 1</b>  | List of parameters in image processing for hNP1 phase contrast images                             |
| <b>Supplementary Table 2</b>  | List of antibodies used for immunocytochemistry                                                   |
| <b>Supplementary Table 3.</b> | List of neural stem cell lines used in this study                                                 |
| <b>Supplementary Video 1</b>  | 8-day time-lapse movie of differentiating hNP1 cells                                              |
| <b>Supplementary Video 2</b>  | Image-processed frames from Supplementary Video 1                                                 |
| <b>Supplementary Video 3</b>  | Calcium imaging movie from day 1 ReNcell culture                                                  |

|                               |                                                                                                                |
|-------------------------------|----------------------------------------------------------------------------------------------------------------|
| <b>Supplementary Video 4</b>  | Calcium imaging movie from day 3 ReNcell culture                                                               |
| <b>Supplementary Video 5</b>  | Calcium imaging movie from day 3 ReNcell culture showing waves of calcium activity.                            |
| <b>Supplementary Video 6</b>  | Calcium imaging movie from day 5 ReNcell culture.                                                              |
| <b>Supplementary Video 7</b>  | Four-day time-lapse movie of differentiating ReNcell culture.                                                  |
| <b>Supplementary Video 8</b>  | Calcium imaging movie from day 3 NCRM-5 culture.                                                               |
| <b>Supplementary Video 9</b>  | Calcium imaging movie from day 3 NCRM-5 culture with immunostain image overlay showing Tuj1 and Ki67 channels. |
| <b>Supplementary Video 10</b> | Calcium imaging movie from day 7 NCRM-5 culture with immunostain image overlay showing Tuj1 and Ki67 channels. |

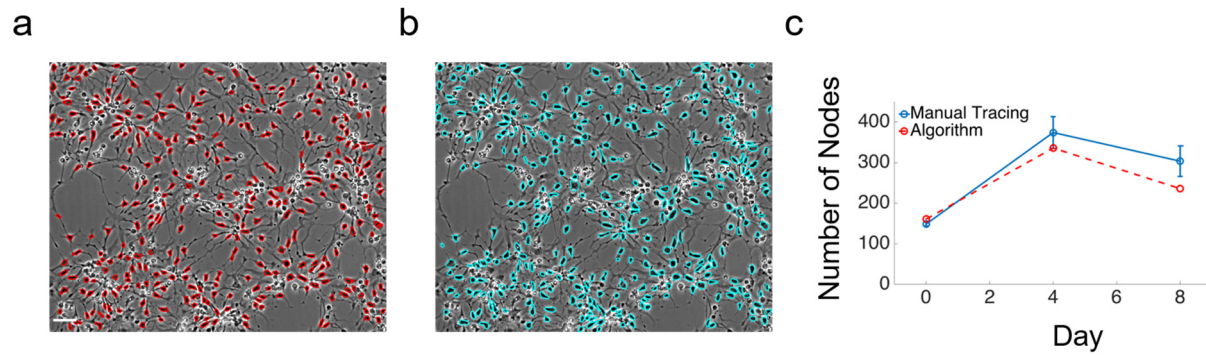

### Supplementary Figure 1

**Comparison of automated image segmentation and manual tracing of cell soma** (a) hNP1 image at day 4 with cell soma outlines picked out by algorithm outlined in red; scale bar = 50  $\mu\text{m}$ . (b) Same image in (a), with manual tracing of cell soma outlined in cyan. (c) Comparison of number of cell soma picked out by algorithm and manual tracing by 3 independent observers. Error bars indicate SEM.

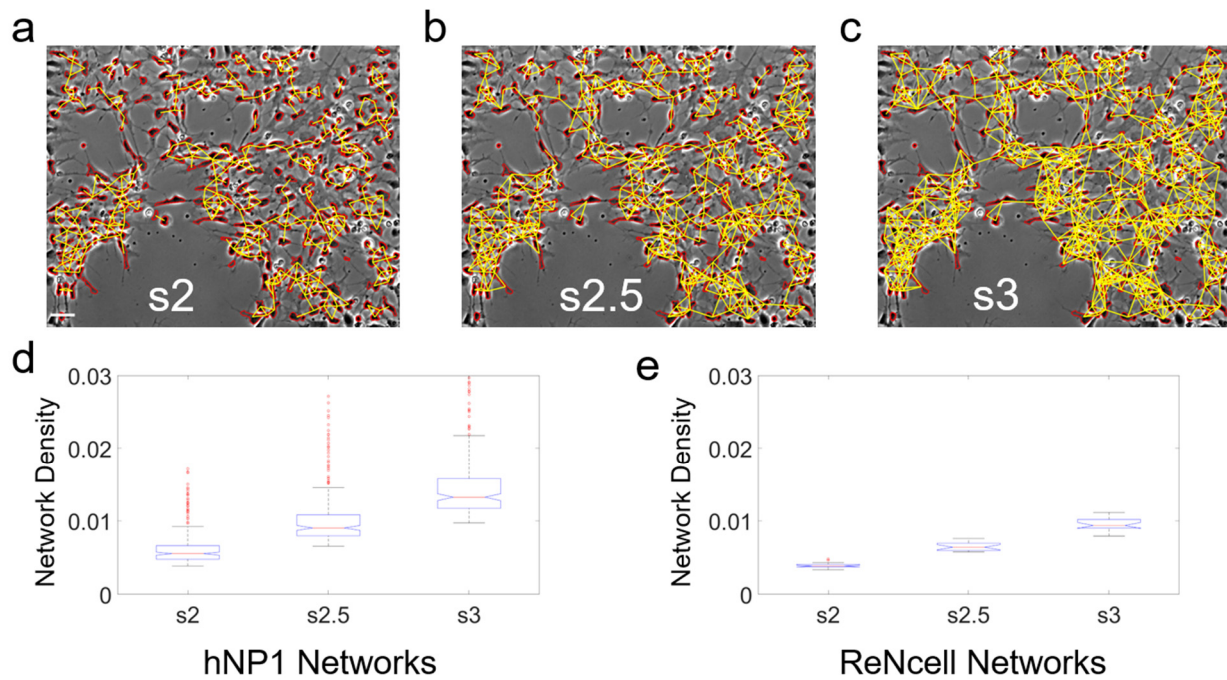

## Supplementary Figure 2

### Scaling factor analysis

(a-c) hNP1 phase contrast image at day 3 of differentiation with graph representations using different scaling factors; scale bar = 50 μm. (a) scaling factor = 2; soma boundaries are outlined in red, and proximity edges are shown in yellow (scale bar = 50 μm). (b) scaling factor = 2.5 (c) scaling factor = 3. (d) Boxplot of network density for all hNP1 networks. (e) Box plot of network density for all ReNcell networks, where nuclei were designated as nodes. Based on similarity in overall network density, scaling factor = 2 was used for phase contrast images (hNP1) and scaling factor = 3 was chosen for nucleus immunofluorescence images (ReNcell, NCRM-5 and CWI 4F2).

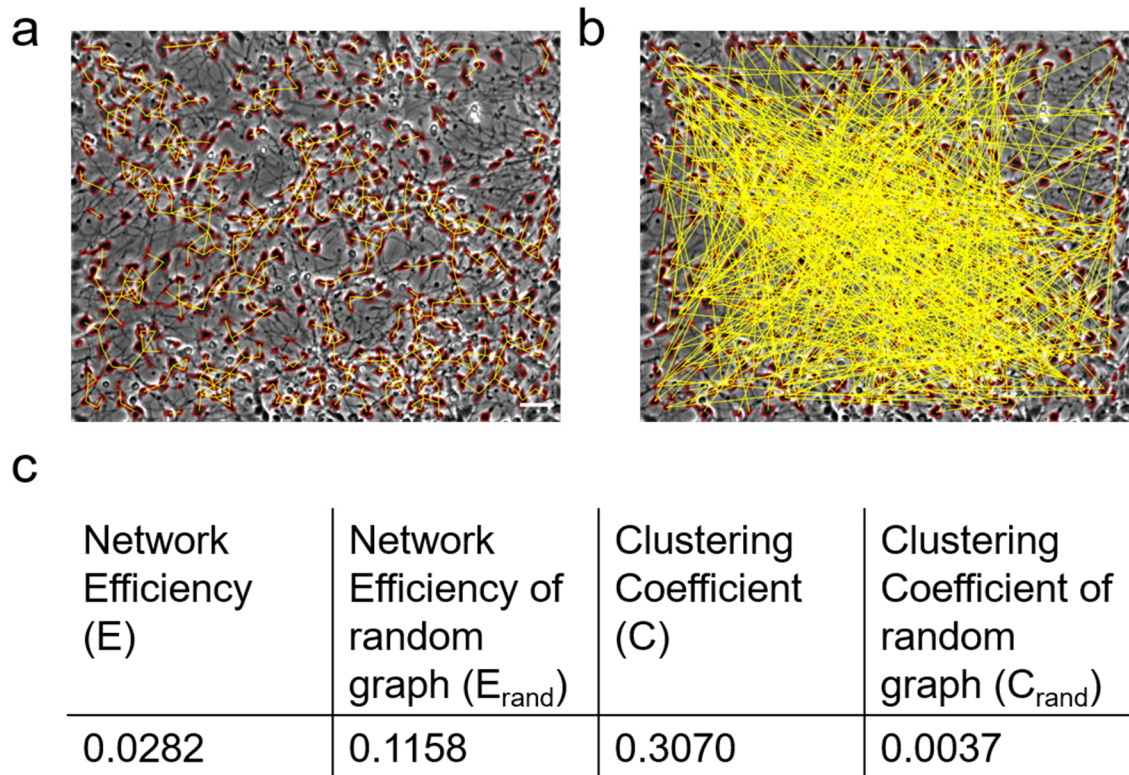

### Supplementary Figure 3

#### Random graph generation through degree-preserving rewiring

**(a)** Original graph representation of day 14 of differentiation image. Cell somata are outlined in red and edges are shown in yellow; scale bar = 50  $\mu$ m. **(b)** Random graph generated by rewiring nodes in panel A with uniform probability. **(c)** Network parameters for graphs in (a) and (b).

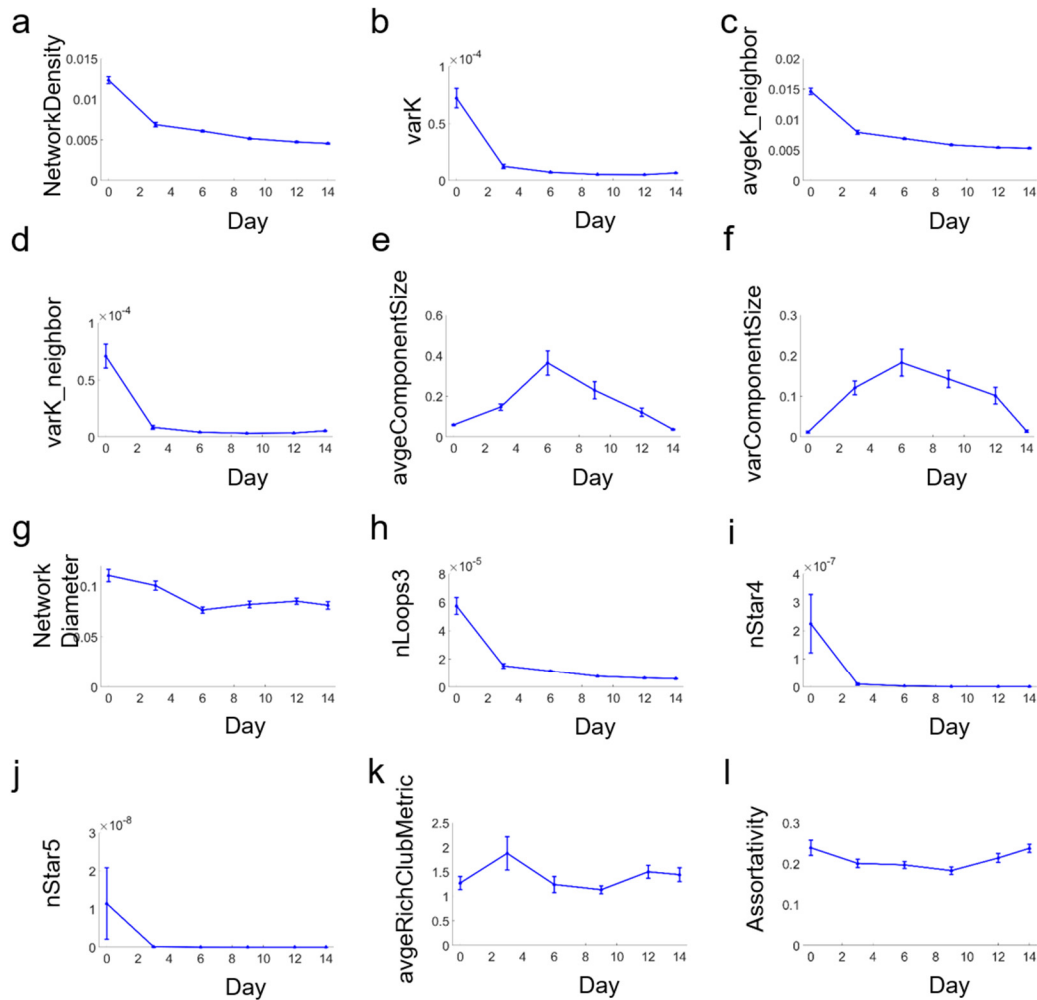

#### Supplementary Figure 4

##### Trends in network metrics in hNP1 cultures not reported in main text.

**(a-d)** All degree-related metrics decrease over 14 days of differentiation. **(a)** Network Density. **(b)** Variance in Degree. **(c)** Average Degree. **(d)** Variance in Neighbor Degree. **(e)** Average component size increases to a peak at day 6 and decreases as cells break up into smaller clusters. **(f)** Variance in Component Size is also highest at day 6. **(g)** Network Diameter. **(h-j)** Counts of loops and star motifs are highest at early stages, due to arrangement of neuroepithelial cells in rosette-like structures. **(h)** Triangular Loop Count. **(i)** 4-Star Motif Count. **(j)** 5-Star Motif Count. **(k)** Rich-Club Metric Average. **(l)** Assortativity.

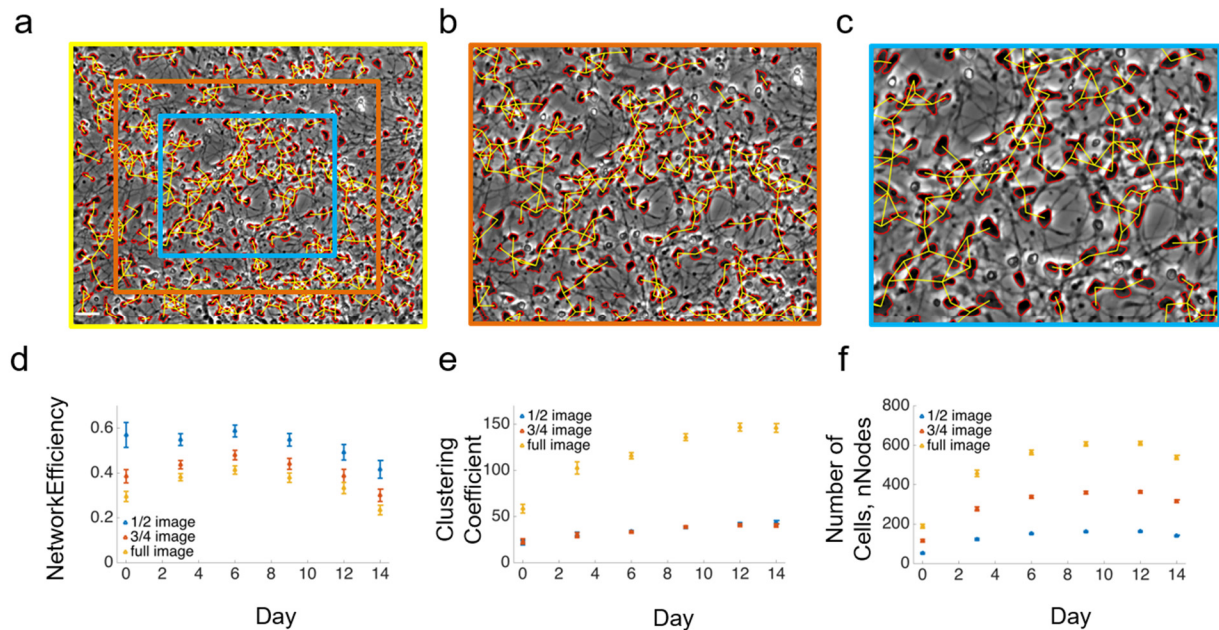

### Supplementary Figure 5

#### Scale invariance of network metrics in hNP1 network analysis

**(a-c)** Different fields of view chosen for network analysis. **(a)** Representative image at day 14 of differentiation; green box represents 75% of the field of view, white box represents 50% of the field of view (scale bar = 50 $\mu$ m). **(b)** Green inset from panel A. **(c)** White inset from (a). **(d-f)** Graph-based metrics computed for full image, 75% of the image and 50% of the image. **(d)** Network Efficiency across time. **(e)** Clustering coefficient. **(f)** Total number of cells in field of view. Values are reported as the mean across N = 30 networks  $\pm$  SEM.



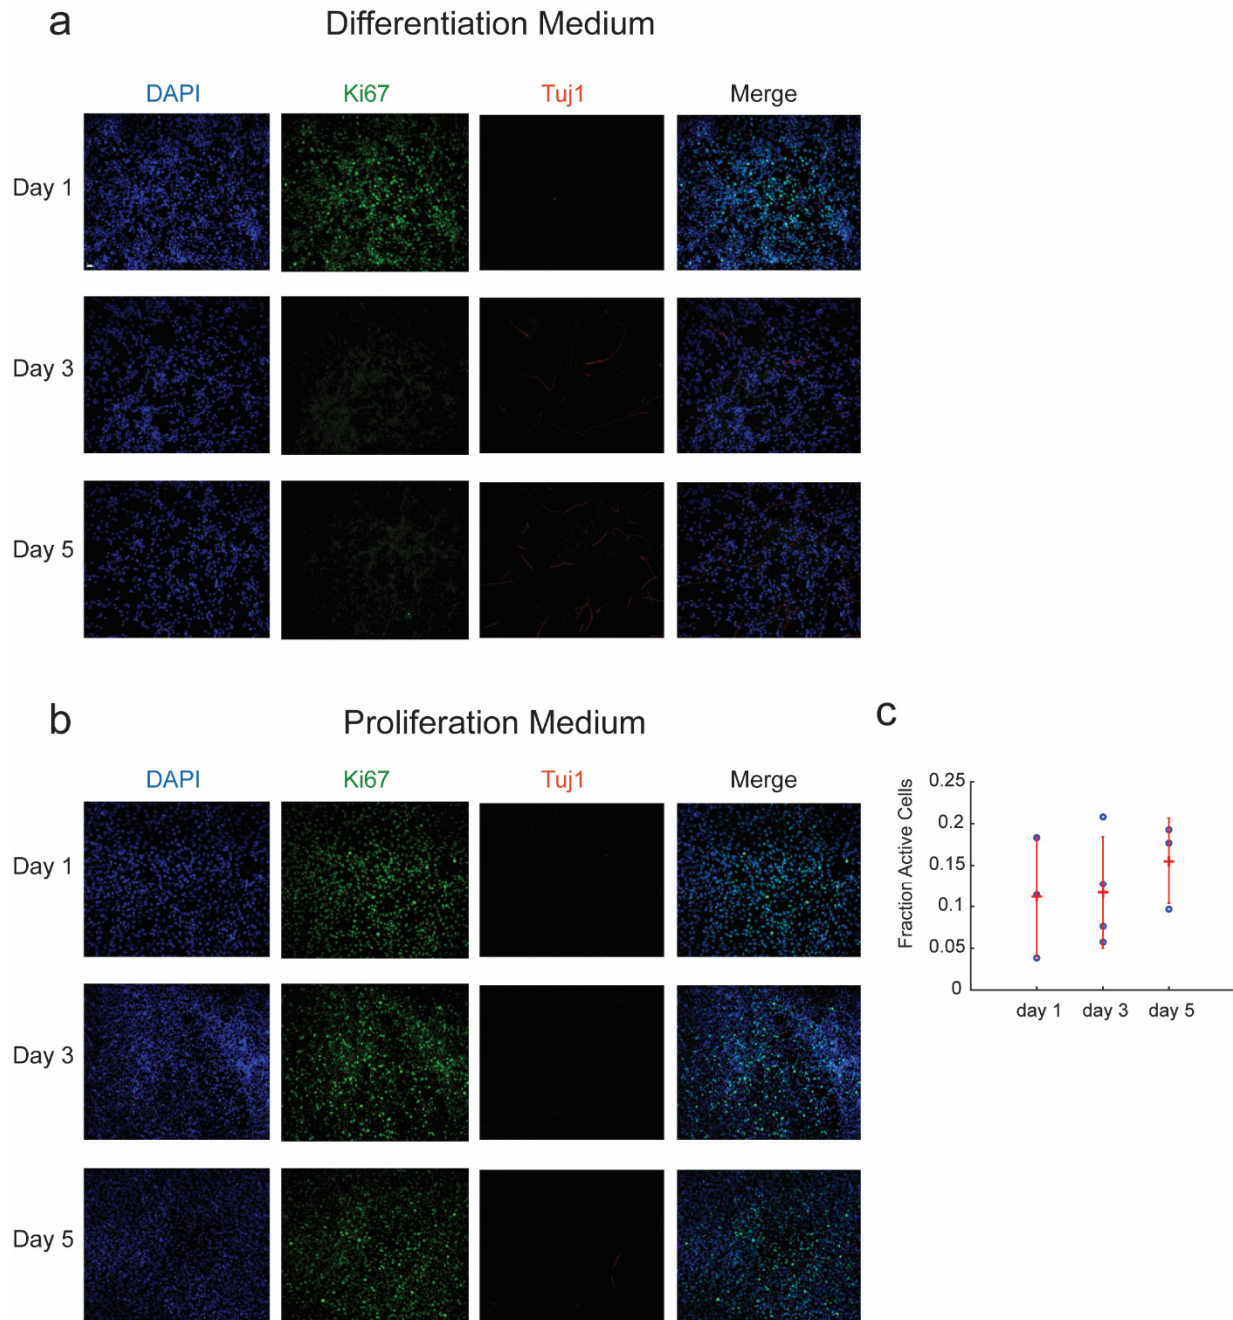

### Supplementary Figure 6.

#### Immunostaining of ReNcell cultures and functional analysis of cultures with proliferation medium.

**(a)** Immunostaining of cultures in differentiation medium for nuclei (DAPI), proliferating cells (Ki67) and new neurons (Tuj1); scale bar = 50 $\mu$ m. **(b)** Immunostaining of cultures in proliferation medium. **(c)** Fraction of active cells in cultures with proliferation medium (cells whose normalized fluorescence traces have three or more calcium transients).

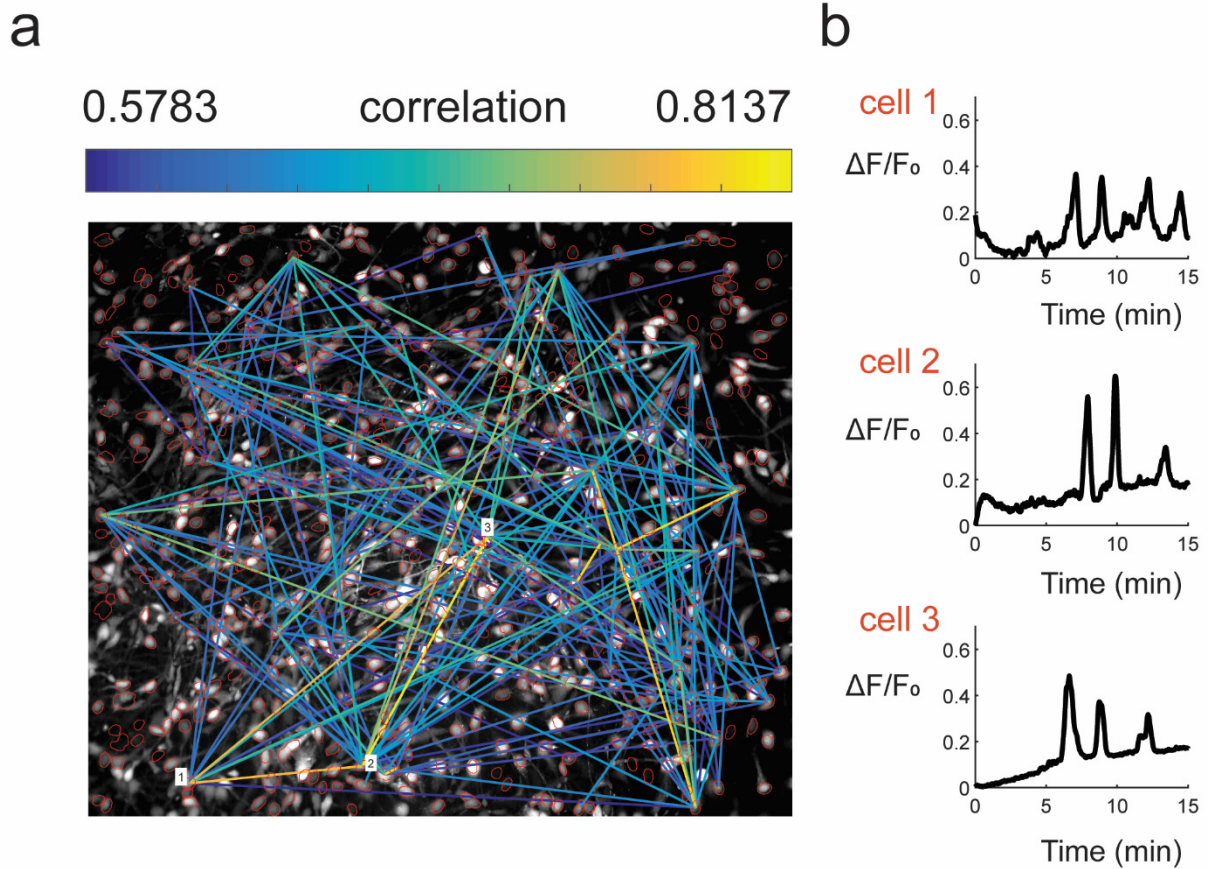

### Supplementary Figure 7

#### Cross-correlation analysis to infer functional connectivity from calcium imaging data.

(a) Maximum intensity image from day 3 ReNcell culture loaded with Fluo-4 for calcium imaging. Inferred functional network is overlaid on the image, with correlation magnitude represented by edge color heatmap. ROIs obtained from corresponding nucleus image are shown in red. (b) Normalized calcium traces from 3 highly correlated cells marked in (a) are shown.

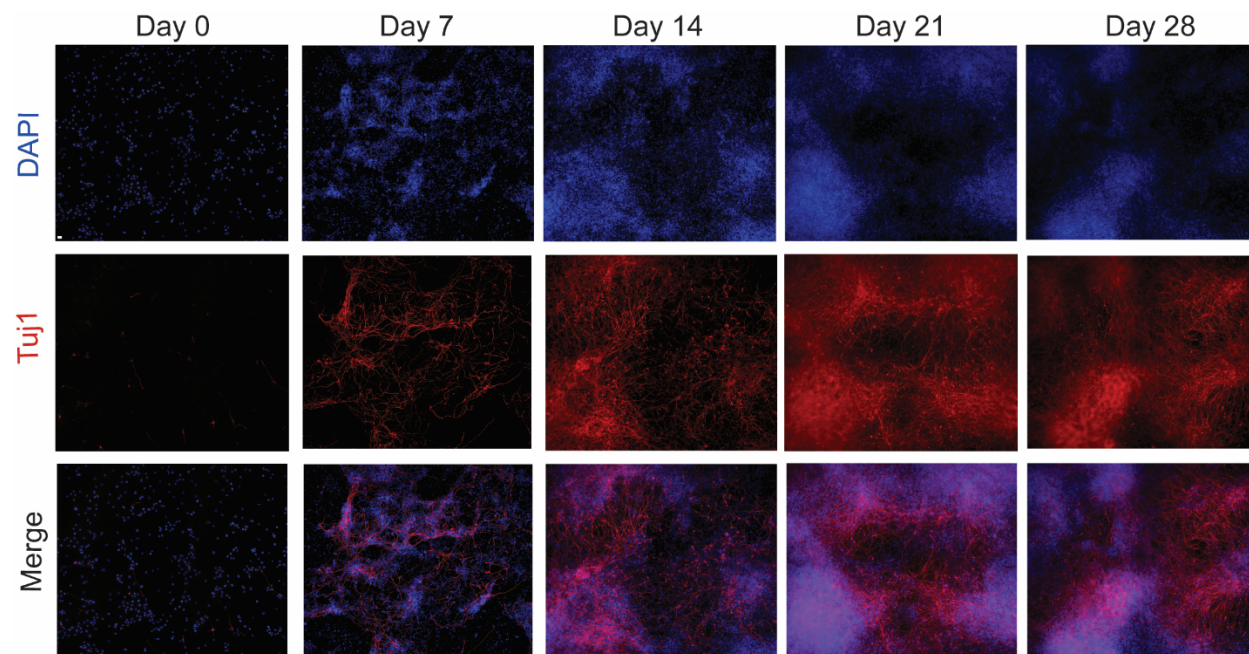

### Supplementary Figure 8

#### Long-term differentiation of NCRM-5 neural stem cells.

NCRM-5 cultures at day 0, 7, 14, 21 and 28 stained for DAPI and  $\beta$ (III)-Tubulin (Tuj1). Cultures become more highly clustered at later stages of differentiation; scale bar - 50 $\mu$ m

**Supplementary Table 1. List of parameters in image processing for hNP1 phase contrast images.**

| <b>Parameter Description</b>                                                          | <b>Parameter Value</b>   |
|---------------------------------------------------------------------------------------|--------------------------|
| Size of median filtering neighborhood                                                 | 3 pixels x 3 pixels      |
| First threshold for removing small particles                                          | 50 pixels                |
| Second threshold for removing small particles (after separation of cell body objects) | 150 pixels               |
| Radius of disk used for morphological opening                                         | 4 pixels                 |
| Neighborhood connectivity used for connected component labeling                       | 8-connected neighborhood |

**Supplementary Table 2. List of antibodies used for immunocytochemistry.**

| <b>Antibody</b>             | <b>Host</b> | <b>Supplier</b>   | <b>Catalog Number</b> | <b>Dilution</b> |
|-----------------------------|-------------|-------------------|-----------------------|-----------------|
| Anti-Nestin                 | Mouse       | Neuromics         | MO15012               | 1:200           |
| Anti-MAP2                   | Rabbit      | Millipore         | AB5622                | 1:500           |
| Anti-Tuj1                   | Mouse       | Millipore         | MAB1637               | 1:2000          |
| Anti-Ki67                   | Rabbit      | Abcam             | Ab15580               | 1.43 $\mu$ L/mL |
| Alexa Fluor 488 anti-mouse  | Goat        | Life Technologies | A-21121               | 1:1000          |
| Alexa Fluor 594 anti-rabbit | Goat        | Life Technologies | A-11037               | 1:1000          |
| Alexa Fluor 594 anti-mouse  | Goat        | Life Technologies | A-11005               | 1:1000          |
| Alexa Fluor 647 anti-rabbit | Goat        | Life Technologies | A-21244               | 1:1000          |

### Supplementary Table 3. List of neural stem cell lines used in this study

| Name       | Source                                                                                      | Primary neuron type formed via differentiation |
|------------|---------------------------------------------------------------------------------------------|------------------------------------------------|
| hNP1       | Derived from H9 human embryonic stem cells                                                  | -                                              |
| ReNcell VM | Ventral mesencephalon of 10-week human fetal brain                                          | Dopaminergic                                   |
| NCRM-5     | Induced pluripotent stem cells derived from human male; NHCDR Cat# ND50031, RRID: CVCL_1E75 | Mixture of glutamatergic and GABAergic         |
| CWI 4F2    | Induced pluripotent stem cells derived from female subject (6 months) with classical SLOS   | Mixture of glutamatergic and GABAergic         |

## Supplementary Videos

**Supplementary Video 1.** 8-day time-lapse movie of differentiating hNP1 human neural progenitor cells.

**Supplementary Video 2.** Same image sequence as in Supplementary Video 1, with cell bodies detected through image processing outlined in red and proximity edges shown in yellow.

**Supplementary Video 3.** Calcium imaging movie from day 1 ReNcell culture. Movie is sped up 100X. Original video was captured with a frame rate of 1Hz for a total duration of 15min.

**Supplementary Video 4.** Calcium imaging movie from day 3 ReNcell culture. Movie is sped up 100X. Original video was captured with a frame rate of 1Hz for a total duration of 15 min.

**Supplementary Video 5.** Calcium imaging movie from day 3 ReNcell culture showing calcium wave propagating through culture. Original video was captured with a frame rate of 1Hz for a total duration of 15 min.

**Supplementary Video 6.** Calcium imaging movie from day 5 ReNcell culture. Movie is sped up 100X. Original video was captured with a frame rate of 1Hz for a total duration of 15 min.

**Supplementary Video 7.** Four-day time lapse movie of differentiating ReNcell cultures. Video was captured at a frame rate of 1 frame/30min.

**Supplementary Video 8.** Calcium imaging movie from day 3 NCRM-5 culture. Movie is sped up 100X. Original video was captured with a frame rate of 1Hz for a total duration of 15 min.

**Supplementary Video 9.** Calcium imaging movie from day 3 NCRM-5 culture with immunostain image overlay showing Tuj1 (red) and Ki67 (blue) channels. Original video was captured with a frame rate of 1Hz for a total duration of 15 min.

**Supplementary Video 10.** Calcium imaging movie from day 7 NCRM-5 culture with immunostain image overlay showing Tuj1 (red) and Ki67 (blue) channels. Movie is sped up 100X. Original video was captured with a frame rate of 1Hz for a total duration of 15 min.
